## 1 Host and microbiome features of secondary infections in lethal covid-19

2 Martin Zacharias<sup>1#</sup>, Karl Kashofer<sup>1#</sup>, Philipp Wurm<sup>1#</sup>, Peter Regitnig<sup>1</sup>, Moritz Schütte<sup>2</sup>, Margit  
3 Neger<sup>1</sup>, Sandra Ehmann<sup>1</sup>, Leigh M. Marsh<sup>3</sup>, Grazyna Kwapiszewska<sup>3</sup>, Martina Loibner<sup>1</sup>, Anna  
4 Birnhuber<sup>3</sup>, Eva Leitner<sup>4</sup>, Andrea Thüringer<sup>1</sup>, Elke Winter<sup>1</sup>, Stefan Sauer<sup>1</sup>, Marion J.  
5 Pollheimer<sup>1</sup>, Fotini R. Vagena<sup>1</sup>, Carolin Lackner<sup>1</sup>, Barbara Jelusic<sup>1</sup>, Lesley Ogilvie<sup>2</sup>, Marija  
6 Durdevic<sup>1</sup>, Bernd Timmermann<sup>5</sup>, Hans Lehrach<sup>2,5</sup>, Kurt Zatloukal<sup>1\*</sup>, and Gregor Gorkiewicz<sup>1\*</sup>

7  
8  
9 <sup>1</sup> Diagnostic and Research Institute of Pathology, Medical University of Graz, Neue  
10 Stiftingtalstrasse 6, A-8010 Graz, Austria

11 <sup>2</sup> Alacris Theranostics GmbH, Max-Planck-Strasse 3, D-12489 Berlin, Germany

12 <sup>3</sup> Ludwig Boltzmann Institute for Lung Vascular Research, Neue Stiftingtalstrasse 6/VI, A-8010  
13 Graz, Austria

14 <sup>4</sup> Diagnostic and Research Institute of Hygiene, Microbiology and Environmental Medicine,  
15 Medical University of Graz, Neue Stiftingtalstrasse 6, A-8010 Graz, Austria

16 <sup>5</sup> Max Planck Institute for Molecular Genetics, Ihnestrasse 63, D-14195 Berlin, Germany

17

18 #contributed equally

19 \*correspondence:

20 Gregor Gorkiewicz, MD

21 Diagnostic and Research Institute for Pathology, Medical University of Graz

22 Neue Stiftingtalstrasse 6, A-8010 Graz, Austria

23 Phone: +43-316-385-71743

24 Email: [gregor.gorkiewicz@medunigraz.at](mailto:gregor.gorkiewicz@medunigraz.at)

25 ORCID: 0000-0003-1149-4782

26 Kurt Zatloukal, MD

27 Diagnostic and Research Institute for Pathology, Medical University of Graz

28 Neue Stiftingtalstrasse 6, A-8010 Graz, Austria

29 Phone: +43-316-385-71732

30 Email: [kurt.zatloukal@medunigraz.at](mailto:kurt.zatloukal@medunigraz.at)

31 ORCID: 0000-0001-5299-7218

32

33

34

35 **Keywords:** Covid-19, autopsy, metatranscriptome, lung microbiome, diffuse alveolar damage,

36 secondary infections, macrophages, complement C1q, immune exhaustion, immune-

37 **NOTE:** This preprint reports new research that has not been certified by peer review and should not be used to guide clinical practice.

checkpoints

38 **Abstract**

39 Secondary infections contribute significantly to covid-19 mortality but host and microbial  
40 factors driving this sequel remain poorly understood. We performed an autopsy study of 20  
41 covid-19 cases and 14 controls from the first pandemic wave. Autopsies combined with  
42 microbial cultivation and deep RNA sequencing (RNAseq) allowed us to define major organ  
43 pathologies and specify secondary infections. Lethal covid-19 segregated into two main death  
44 causes separating cases with either dominant diffuse alveolar damage (DAD) or secondary  
45 infections of lungs. Lung microbiome changes were profound in covid-19 showing a reduced  
46 biodiversity and increased presence of prototypical bacterial and fungal pathogens in cases  
47 with secondary infections. Deep RNAseq of lung tissues distinctly mirrored death causes and  
48 cellular deconvolution stratified DAD cases into subgroups with different cellular  
49 compositions. Myeloid cells, including macrophages, and complement C1q activation were  
50 found to be strong stratifying factors suggesting a pathophysiological link possibly leading to  
51 tolerance in DAD subgroups. Moreover, several signs of immune-impairment were evident in  
52 covid-19 lungs including strong induction of inhibitory immune-checkpoints. Thus, our study  
53 highlights profound alterations of the local immunity in covid-19, wherein immune-  
54 impairment leads to reduced antimicrobial defense favoring the development of secondary  
55 infections on top of SARS-CoV-2 infection.

56

57

58

59

60

61

## 62 **Introduction**

63           Covid-19 originates from infection of the upper respiratory tract with SARS-CoV-2,  
64 which can progress into severe acute lung injury (ALI). Based on the tissue-typic expression of  
65 the viral host-entry receptor ACE2 and certain proteases (e.g. TMPRSS2) facilitating cellular  
66 uptake, also other organs like the kidney could be directly infected [1]. In addition, severe  
67 disturbance of immune and coagulation systems during covid-19 lead to a multifaceted  
68 disease with variable multi-organ damages [2]. A consistent finding in severe covid-19 is initial  
69 immune hyperactivation (called "cytokine storm") leading to subsequent immune exhaustion,  
70 a phenomenon also known in other severe infections [3-6]. Consequently, secondary  
71 infections which develop on top of SARS-CoV-2 infection contribute significantly to covid-19  
72 mortality similar to severe influenza [7]. Curiously, the pathophysiology leading to the  
73 development of secondary lung infections is generally poorly understood. We performed an  
74 autopsy study of 20 consecutive covid-19 patients, who died during the first pandemic wave.  
75 Full autopsies were performed and various specimen types were collected for tissue-based  
76 investigations, molecular measures including deep sequencing and cultivation of virus and  
77 other microbes. Integrating all the information gained from this "holistic" autopsy approach  
78 allowed us to gain a deeper understanding of host and microbial factors contributing to  
79 secondary infections as a major sequel of lethal covid-19.

80

## 81 **Autopsy cohort, SARS-CoV-2 body distribution and genotyping**

82           Twenty consecutive covid-19 patients were examined post-mortem (Figure S1).  
83 Thirteen cases were males and 7 were females, their age ranged from 53 to 93 years (median:  
84 79 years). All had multiple comorbidities typically prevalent in severe covid-19. In addition, 14  
85 age-matched non-covid-19 controls who died within the same time period were included for

86 comparisons (Tables S1 and S2). Patients were tested for SARS-CoV-2 tissue distributions by  
87 quantitative RT-PCR (target: nucleocapsid-gene) and most positive samples with the highest  
88 viral loads originated from the respiratory tract, followed by myocardium, liver, kidney and  
89 pleural effusions. Other tissues and body liquids were positive only in single cases or tested  
90 overall negative (Figure 1A). Notably, deep RNAseq generated from lung tissues revealed  
91 SARS-CoV-2 transcripts in each covid-19 case, including the four qRT-PCR negative ones,  
92 showing increased sensitivity of deep transcriptomic analysis (127±29 million reads were  
93 generated per sample on average; Figure 1B). The viral genome was entirely captured by deep  
94 RNAseq from lung tissues yielding more plus-strand reads (mean: 37.89 reads per million;  
95 range: 0.02-131,165.41) than minus-strand reads (mean: 1.81 reads per million; range: 0-  
96 484.81; Figure 1C). In addition, 11 SARS-CoV-2 strains could be cultivated from post-mortem  
97 lung tissues using Vero cells (Table S3). Successful virus cultivation significantly correlated with  
98 abundance of SARS-CoV-2 reads (Figure 1D and S2).

99 SARS-CoV-2 genotyping facilitated by PCR and sequencing directly from autopsy  
100 specimens yielded 14 complete viral genomes (Table S4). Nine different sequence variants  
101 were detected showing up to 12 nucleotide changes compared to the reference (SARS-CoV-2  
102 Wuhan-Hu-1; total genome size 29,903 bp; Table S5). Strains corresponded to the pangolin  
103 lineages B.1.22, B1.5, B and B.1.160.1, respectively (clades 19A and 20A), representing the  
104 dominant genotypes of the first pandemic wave (Figure 1E). Twelve strains harbored a D614G  
105 mutation in the spike (S) protein, which leads to increased viral transmissibility and, therefore,  
106 this genotype superseded the wild-type strain already early in the pandemic [8]. We identified  
107 also 2 viral clusters in our cohort, cluster 1 (case 3, 4, 6, 8, and 9) and cluster 2 (case 1, 2, and  
108 5), respectively (Figure 1F).

109

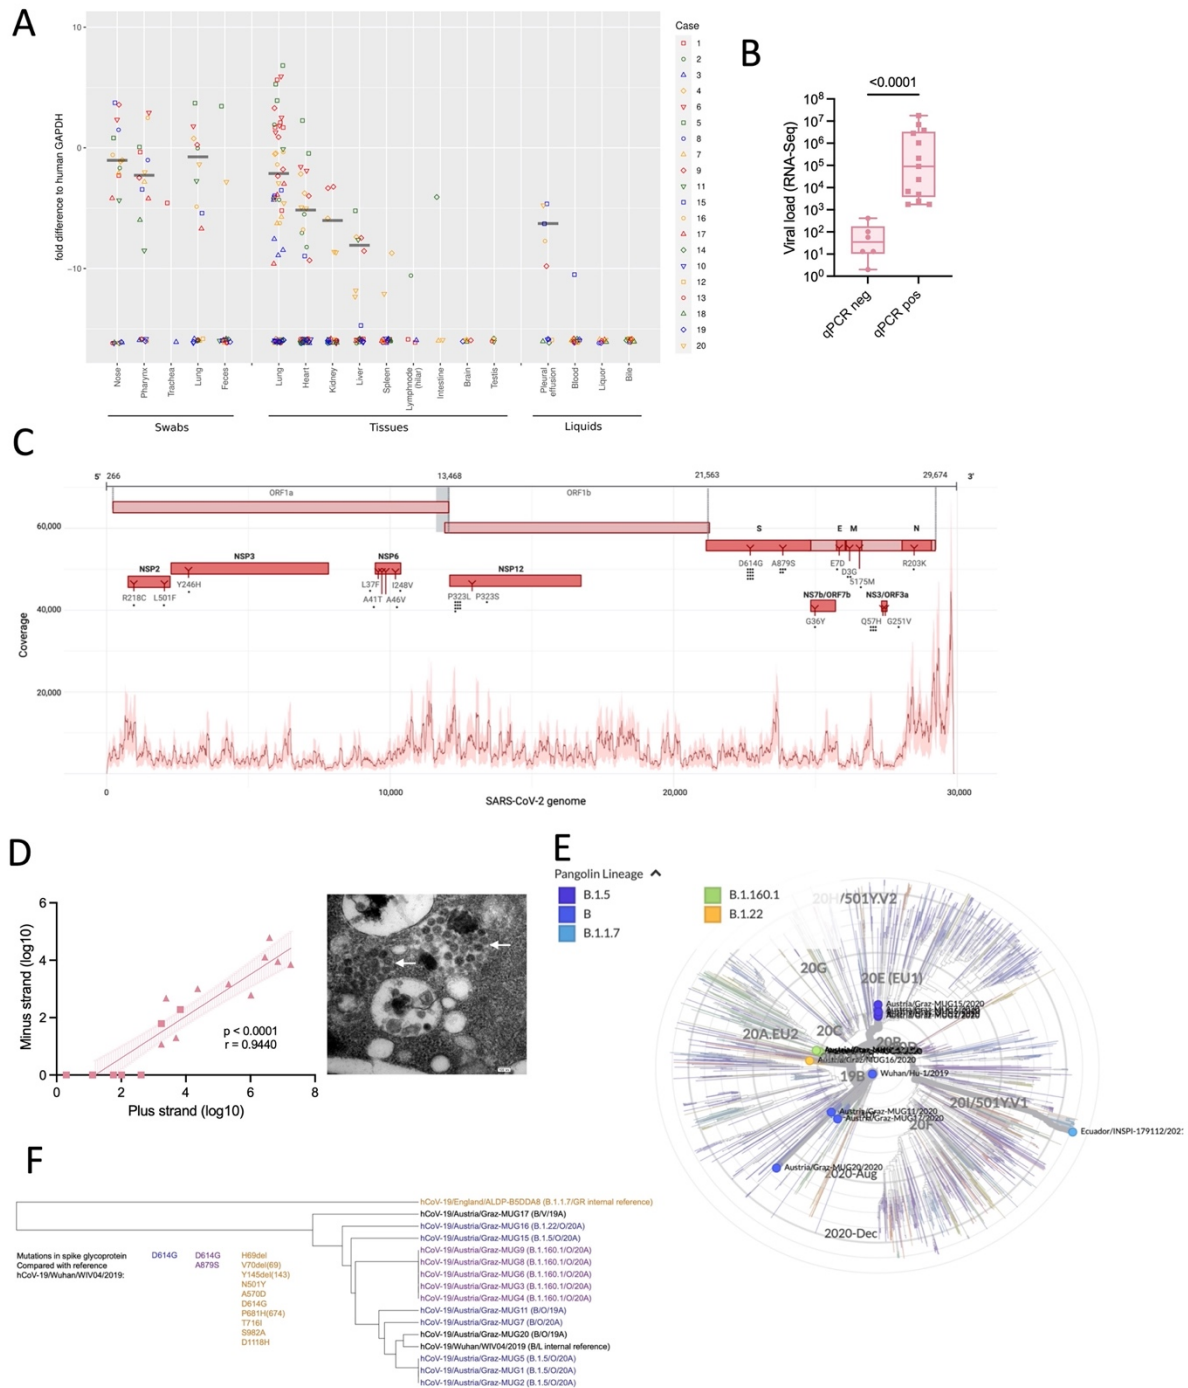

110

111 **Figure 1. SARS-CoV-2 tissue distributions, genotyping and virus cultivation.** (A) SARS-CoV-2  
 112 loads (compared to human glyceraldehyde 3-phosphate dehydrogenase, GAPDH) and tissue  
 113 distributions derived from post mortem sampling (median highlighted). Case numbers are  
 114 given on the right. (B) Significant association of qRT-PCR positivity (n-gene) with viral loads  
 115 determined by RNAseq of lung tissues (Mann-Whitney test). (C) Distribution of viral reads  
 116 generated from lung tissues along the SARS-CoV-2 genome. Cumulative coverage of plus and  
 117 minus strand transcripts is shown (median in bold). Identified nucleotide and amino-acid  
 118 changes in comparison to the Wuhan reference strain are indicated. (D) Correlation of SARS-  
 119 CoV-2 plus and minus strand reads with cultivation (Spearman correlation). Triangles specify  
 120 cultivation-positive samples. EM picture showing viral particles in Vero CCL-81 cells (arrows).  
 121 (E) Cladogram showing detected virus genotypes within a global context. The Wuhan

122 reference strain (center) and the UK variant B.1.1.7 (Ecuador/INSPI-179112/2021) are  
123 included for comparisons. The pangolin lineage designation is used to specify viral genotypes.  
124 (F) Dendrogram showing detected viral genotypes. Corresponding mutations in the S protein  
125 are indicated and virus strains are color coded accordingly.  
126

127 Notably, cases 6, 8 and 9 from cluster 1 originated from the same residential care home and  
128 all cases from cluster 2 stayed in the same hospital ward prior to covid-19. Thus, it is very likely  
129 that these individuals were infected from the same sources and/or transmission occurred.

130

### 131 **Major organ pathologies and death causes**

132 Lungs showed the dominant pathologies in relation to covid-19, only one case (#1)  
133 presented with acute myocardial infarction as the ascribed death cause. Diffuse alveolar  
134 damage (DAD), the histopathological representation of ALI, in a patchy distribution and often  
135 prevalent in multiple lung segments was the major finding in 11 cases. Early exudative stages  
136 and later organizing stages of DAD were found within the same patient together, often  
137 adjacent to nearly normal or less affected parenchyma indicating ongoing tissue damage  
138 (Figures 2A and S3-S5). Also, a significant positive correlation of SARS-CoV-2 loads from  
139 nasopharyngeal tissues compared to lungs was found (Figure 2B), which suggests active  
140 seeding of infectious particles from the upper respiratory tract likely via micro-aspiration into  
141 the lungs [1]. Microscopic features of lungs were extensively assessed (see methods for details  
142 of scoring histopathological changes) to specify and grade the severity of lesions and also to  
143 capture the heterogeneity of different lung pathologies. Features greatly varied between  
144 cases and no pattern clearly correlated with disease duration (defined as the interval between  
145 the first SARS-CoV-2 positive PCR and death) or viral loads (Figure 2C). Importantly, the  
146 clearest discriminating feature of cases was the presence of neutrophilic granulocytes,  
147 indicative of secondary infections (i.e. "pneumonia"), in comparison to DAD.

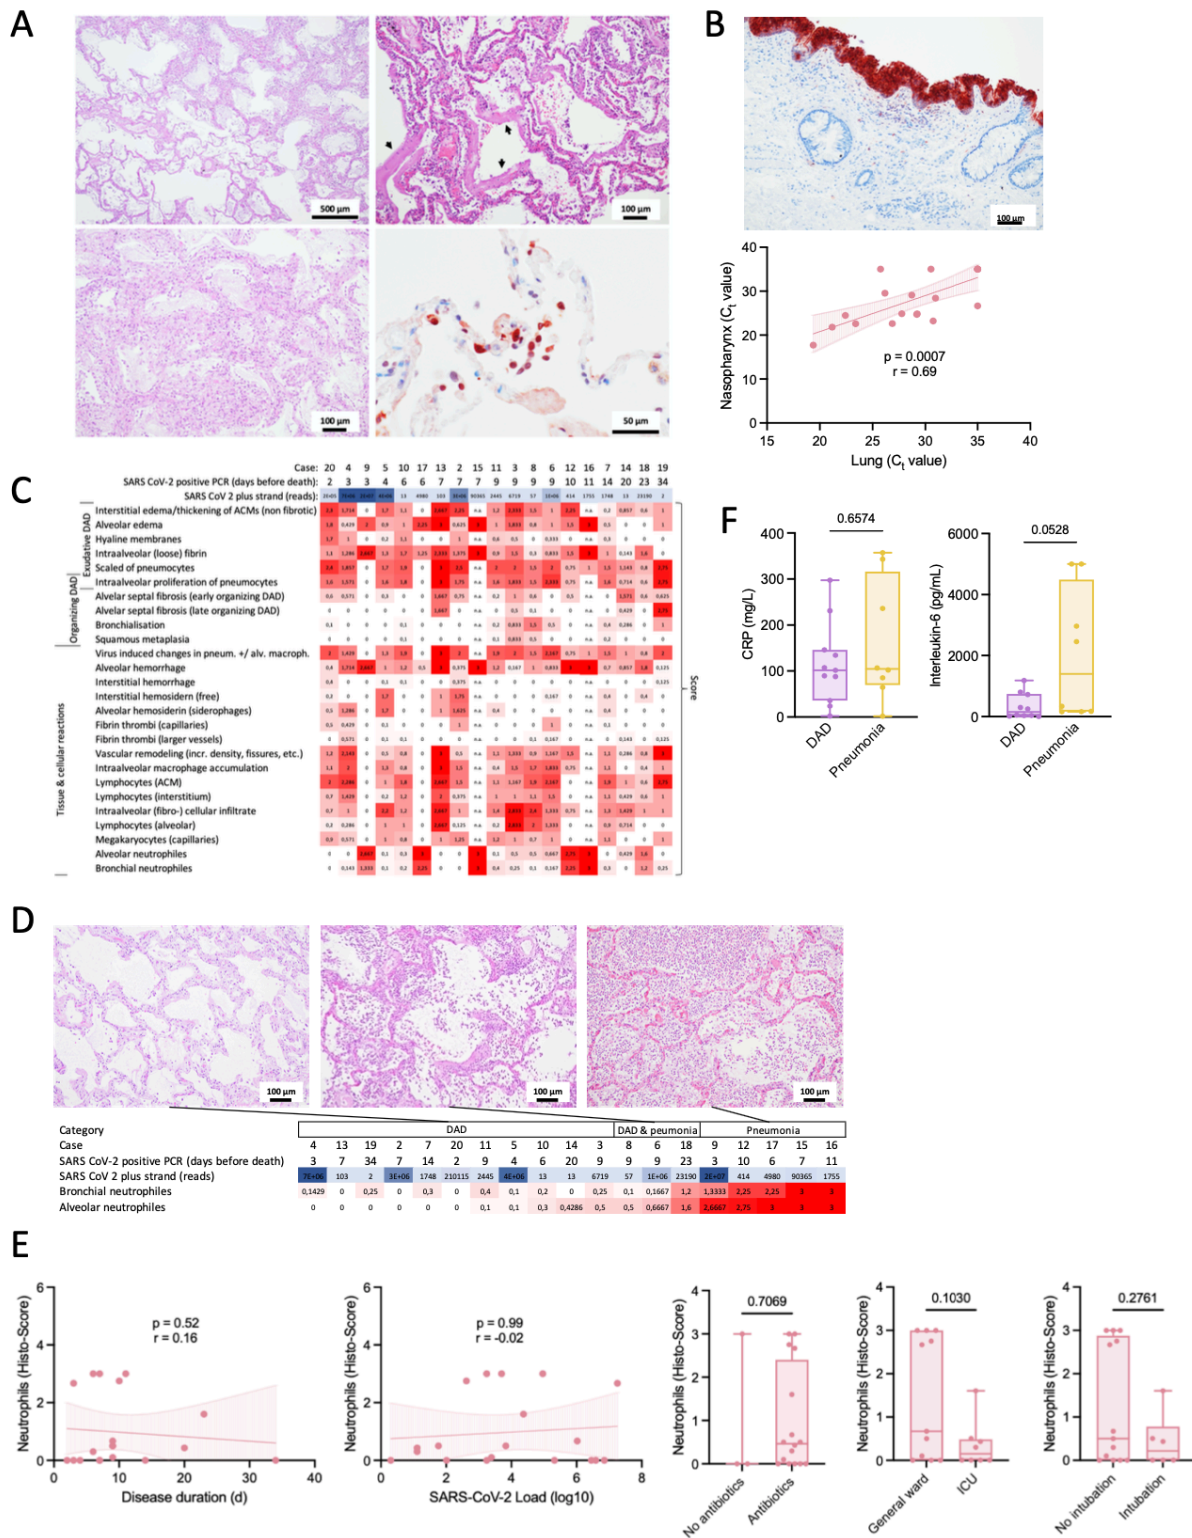

148  
149

150 **Figure 2. Lung pathology of lethal covid-19 stratifies into diffuse alveolar damage and**  
 151 **pneumonia.** (A) Histological representation of diffuse alveolar damage (DAD) in lungs. A  
 152 patchy representation of DAD is shown (left). Hyaline membranes (arrows) as a hallmark  
 153 lesion of early DAD (top right). Immunohistochemical detection (nucleoprotein antibody) of  
 154 SARS-CoV-2 infected pneumocytes (bottom right). (B) (Top) Immunohistochemical detection  
 155 of SARS-CoV-2 infected respiratory epithelium of the nasopharynx. (Bottom) Correlation  
 156 between SARS-CoV-2 loads in the nasopharyngeal mucosa and lung tissue determined by qRT-  
 157 PCR (Spearman correlation). (C) Scoring of prevalent histopathology patterns in lungs. Cases

158 are ordered according to duration of disease. (D) Main discrimination of lung pathology  
159 according to DAD and pneumonia patterns. Cases are ordered according to alveolar neutrophil  
160 counts. (E) Correlation analyses of neutrophil abundance and clinical parameters (Spearman  
161 correlation; Mann-Whitney test). (F) Serum C-reactive protein (CRP) and interleukin-6 (IL-6)  
162 levels (Mann-Whitney test) in DAD versus pneumonia cases.  
163

164 Three cases showed DAD superimposed with acute inflammation and 5 cases showed mainly  
165 pneumonia as the dominant pathology, wherein DAD was only focally visible overlaid with  
166 dense inflammation. Altogether, 16 cases showed neutrophilic granulocytes present in  
167 bronchi, bronchioli or alveoli suggestive of secondary infections. Thus, lung histopathology in  
168 lethal covid-19 could be stratified into DAD, DAD superimposed with pneumonia and  
169 dominating pneumonia (Figures 2D and S3). Noteworthy, neither disease duration nor viral  
170 loads correlated with presence of neutrophils, nor did any other clinical parameter (Figures  
171 2E and S6), however, pneumonia cases showed increased IL-6 levels compared to pure DAD  
172 cases, whereas CRP levels did not differ between categories (Figure 2F). Other organs showed  
173 features of preexisting comorbidities including arteriosclerosis, hypertension and diabetes,  
174 especially in the kidneys, wherein SARS-CoV-2 could be detected in tubular epithelia by  
175 positive immunohistochemistry (Figure S7). Heart and liver specimens revealed no clear  
176 evidence of direct SARS-CoV-2 carriage nor features of myocarditis or hepatitis (Figures S8 and  
177 S9). A detailed summary of organ histopathologies is given in the supplementary appendix  
178 (Table S6).

179

## 180 **Lung microbiome alterations and secondary-infections in lethal covid-19**

181 The lung microbiome is altered in DAD and thought to be a relevant factor for the  
182 development of secondary infections [9, 10]. RNAseq data from lung tissues was screened for  
183 microbial sequences and bacterial (16S rRNA gene) and fungal (internal transcribed spacer,  
184 ITS) marker genes were amplified to additionally specify microbial changes. On average



185 6573.33±2552.32 (MW±SD) reads per million (rpm) per sample were not human in RNAseq  
186 and likely of microbial origin, of those 2.02±4.00% and 0.03±0.05% could be clearly annotated  
187 to specific microbes with different microbial annotation pipelines (Figure 3A). Excluding SARS-  
188 CoV-2 reads, which were the dominant microbial component in several cases (range: 0.01 –  
189 131218.36 rpm), bacterial sequences were dominant, significantly increased in covid-19 cases  
190 with pneumonia compared to DAD and controls. Fungal and viral sequences other than SARS-  
191 CoV-2 were also significantly enriched in covid-19 cases with pneumonia (Figure 3B). Number  
192 of bacterial reads significantly correlated with neutrophil scores suggesting that their  
193 presence is a sign of secondary infections, however, the post-mortem interval did not,  
194 precluding a strong influence of post-mortal bacterial overgrowth in our investigation (Figure  
195 3C). Bacteria are assumed to be the dominant microbiome component in lungs [11]. Analysis  
196 based on the bacterial 16S rRNA gene marker showed that richness was significantly  
197 decreased in the DAD and pneumonia cases of covid-19 compared to controls indicating an  
198 overall reduced biodiversity (Figure 3D). In contrast, evenness was significantly decreased in  
199 the pneumonia group of covid-19 only, suggesting a dominance of certain taxa, possibly  
200 representing the agents of secondary infections (pairwise Kruskal-Wallis; \*p<0.05,  
201 \*\*p<0.005). Principal component analysis (PCA) clearly separated controls from covid-19  
202 cases with DAD and cases with pneumonia indicating significantly different bacterial  
203 community compositions (Figure 3D). Lung tissues were also cultured for bacteria and fungi  
204 and both, covid-19 cases and controls, yielded cultivable microorganisms but in different  
205 quantities and taxonomic constellations (Table S7).



214 UniFrac and Bray Curtis distance) clearly separates DAD and pneumonia cases of covid-19  
215 from controls (16S rRNA gene). (F) Summary of bacterial, fungal and viral microbes prevalent  
216 in covid-19 lungs. Shown are microbes detected by cultivation, RNA and/or DNA sequencing.  
217 (G) Dominant pathogens causing secondary infections in covid-19 lungs compared to controls  
218 (summary of cultivation and deep sequencing). (H) Microscopic representation (H&E) of  
219 bacterial (left, case #16) and fungal (middle, case #18) pathogens in lung tissues. Epstein Barr  
220 virus RNA positivity in lung tissue (EBV RNA in-situ hybridization, case #11).  
221

222 Finally, we integrated RNAseq, 16S, ITS and culture data to define dominant pathogens, most  
223 likely representing the agents of secondary infections and to account for the different samples  
224 used for microbial identifications in the light of the patchy disease representations likely  
225 impacting the microbial repertoires (Figure S10, Table S8). Dominant pathogens were defined  
226 if they were dominant in the RNA and/or DNA data (representing > 10% of microbial reads  
227 excluding SARS-CoV-2) and if they also yielded a reasonable culture growth ( $\geq 10^4$  cfu/ml).  
228 Dominant taxa were typical agents of pulmonary secondary infections like *Staphylococcus*  
229 *aureus*, *Enterococcus faecium* or *Klebsiella pneumoniae*, as well as fungi like *Candida* spp. or  
230 the mold *Rhizopus microsporus* identified in one case (#18). Often multiple pathogens were  
231 found simultaneously indicating polymicrobial infections (e.g. in case #16 wherein *K.*  
232 *pneumonia*, *S. aureus* and *C. glabrata* were cultivated in reasonable amounts and were also  
233 captured by RNAseq). In addition, 5 covid-19 cases yielded transcripts of Epstein Barr virus  
234 (EBV), which were also detectable by RNA *in-situ* hybridization of lung tissues but not in  
235 controls (Figure 3H). EBV often emerges due to endogenous reactivation in the context of  
236 impaired immunity [12]. Control cases yielded microbial sequences and cultivable microbes in  
237 lower quantity and they often belonged to known contaminants like *Lactobacillus* sp. or  
238 *Propionibacterium* sp. (Table S8). In summary, the lung microbiome in covid-19 shows a  
239 reduced taxonomic richness but harbors a diverse spectrum of bacterial and fungal pathogens  
240 typically associated with secondary lung infections. Prominent pathogens like *S. aureus*,  
241 *Klebsiella* or *Candida* spp. are also known agents of secondary infection in influenza, SARS and

242 MERS [13, 14]. Notably, secondary infections were rarely detected ante-mortem in our cohort  
243 (Table S8). The presence of poly-microbial infections and the relatively high proportion of EBV  
244 positivity suggests an overall impaired immunity in covid-19 lungs.

245

#### 246 **The lung metatranscriptome mirrors the major death categories DAD and pneumonia.**

247 Deep RNAseq of lung tissue revealed 4,547 differentially expressed genes between  
248 covid-19 cases and controls (adj.  $P < 0.05$ ). Hierarchical clustering indicated depleted (cluster  
249 1) or enriched (cluster 2) genes in covid-19 compared to controls (Figure 4A). Pathway analysis  
250 indicated impaired central cellular functions within mRNA metabolism, post-translational  
251 protein modification, the respiratory chain, VEGFA signaling and extracellular matrix  
252 organization in covid-19. Enriched pathways consisted mainly of innate and adaptive immune  
253 functions, neutrophil degranulation, cytokine signaling as well as complement activation  
254 (Figure 4B). Overall, these data confirm profound and complex transcriptional alterations in  
255 covid-19 lung tissue [15-17]. Unsupervised principal components analysis (PCA) of  
256 differentially expressed genes clearly separated covid-19 samples on principal component 1  
257 (PC1) from controls but also clearly separated pneumonia samples from pure DAD cases  
258 (Figure 4C). Comparison of differentially expressed genes between these major death  
259 categories indicated that the major discriminator from controls was DAD showing 3862 unique  
260 differentially expressed genes (adj.  $P < 0.05$  and abs LFC  $\geq 0.58$ ) followed by pneumonia with  
261 1673 unique differentially expressed genes (Figure 4D). DAD and pneumonia differed by only  
262 226 differentially expressed genes. Notably, amongst the top 50 differential expressed genes  
263 enriched in pneumonia cases several macrophage markers were evident, including the  
264 receptor *ADGRE1* (murine homolog F4/80) as top-hit, the interleukin-1 receptor-associated  
265 kinase-like 2 (*IRAK2*) or *PSTPIP2*, which is involved in macrophage polarization (Figure 4E).

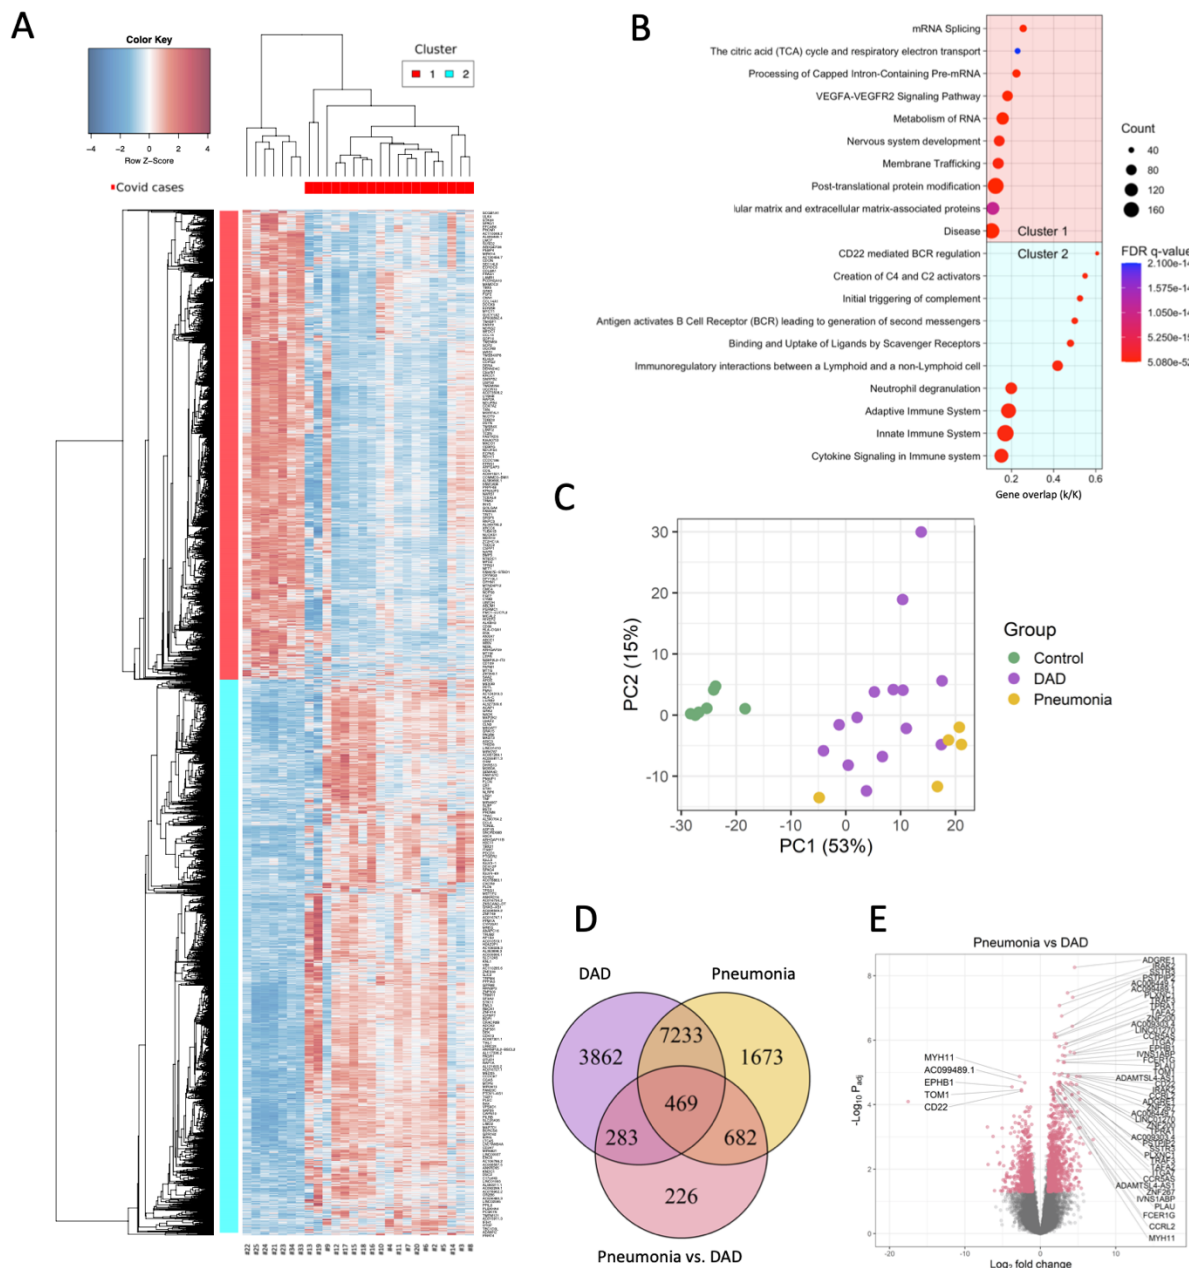

266

267 **Figure 4. The lung metatranscriptome mirrors the major death categories DAD and**  
 268 **pneumonia.** (A) Hierarchical clustering shows depleted (cluster 1) and enriched (cluster 2)  
 269 genes (n=4,547; adj. P<0.05) in lung tissue of covid-19 cases compared to controls. (B) Gen set  
 270 enrichment analysis (canonical pathways) of major depleted (top) and enriched (bottom)  
 271 pathways in covid-19 lungs. (C) PCA based on differentially expressed genes clearly  
 272 discriminates DAD cases and cases with secondary pneumonia of covid-19 from controls. (D)  
 273 Venn diagram specifying differentially expressed genes in DAD as the major discriminator  
 274 followed by pneumonia (adj. P<0.05, LFC≥0.58). (E) Volcano plot showing the top 25  
 275 significantly deregulated genes in secondary pneumonia versus DAD. Several macrophage  
 276 genes are increased.

277

278

279 Thus, macrophages seem to be implicated in covid-19 secondary infections. In summary, deep  
280 transcriptomic analyses specified multiple dysregulated processes in covid-19, including  
281 vascular and coagulation systems, connective tissue remodeling as well as activated immunity  
282 and complement [18]. Similar to histopathology, the major discriminator from controls based  
283 on gene expression was DAD followed by pneumonia likely mirroring the development of  
284 secondary infections on top of ALI caused by the virus.

285

### 286 **Cellular deconvolution subgroups covid-19 lung pathology.**

287 Cellular compositions were inferred from deep RNAseq data by using xCell [19].  
288 Hierarchical clustering based on cellular compositions clearly separated samples into four  
289 distinct groups. Group 1 ("control") consisted only of control cases and was related to group  
290 2 ("DAD1") consisting of covid-19 cases with pure DAD (in addition to one control case #22).  
291 Group 3 ("DAD2") contained also DAD cases, including one sample with the histological  
292 category DAD and secondary pneumonia. This group was related to group 4 ("pneumonia")  
293 composed of all pneumonia cases, in addition to 3 DAD cases and the two remaining DAD  
294 cases with secondary pneumonia (Figure 5A). Noteworthy, neither disease duration nor SARS-  
295 CoV-2 loads clearly correlated with a specific grouping. Cell types discriminating these groups  
296 showed a specific assembly (Figure 5B). Cluster 1 consisted mainly of vascular and stromal cell  
297 types like endothelial cells, pericytes and fibroblasts, enriched in "DAD1" and "DAD2". Top  
298 enriched genes in this cluster were certain collagen genes, the vascular transcription factor  
299 *sox 18*, the basement membrane protein *laminin-1* or the endothelial protein *stabilin-1* (Figure  
300 5C). Cell types of cluster 2 consisted mainly of structural and stromal cells, in addition to  
301 certain immune and blood cell types and they were overall reduced in covid-19.

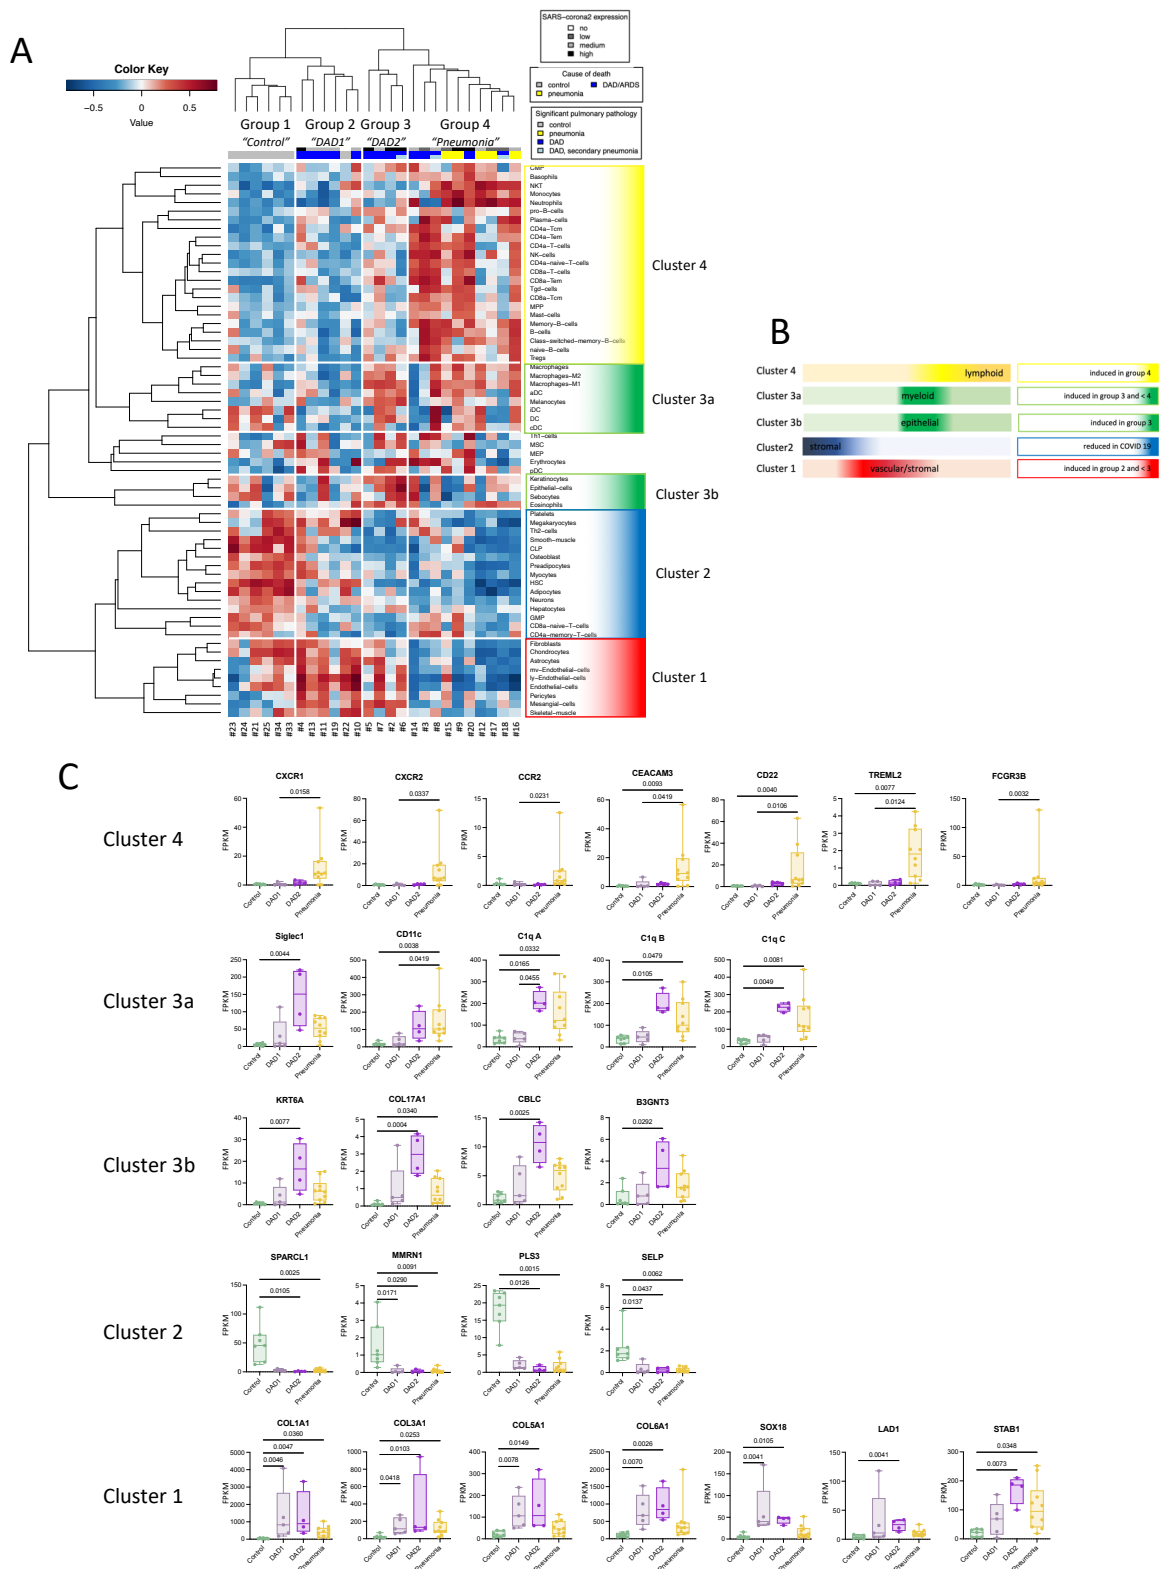

302

303 **Figure 5. Cellular deconvolution stratifies lung pathology sub-groups.** (A) Hierarchical  
 304 clustering based on cell-type enrichments derived from xCell analysis indicates a specific  
 305 grouping of samples. (B) Scheme indicating cell clusters which discriminate different groups.  
 306 (C) Top induced genes in the respective cell clusters determining the specific grouping  
 307 (Kruskal-Wallis test).

308

309 Top down-regulated genes included the extracellular matrix proteins *sparc-like 1*, *multimerin-*  
310 *1* and *plastin-3* or the cell adhesion molecule *p-selectin* important for the recruitment of  
311 leukocytes typically prevalent on activated endothelial cells and platelets (Figure 5C).  
312 Together these alterations highlight the vascular and connective tissue changes emerging  
313 during DAD development (Figure 2B) [20, 21]. Cell types of cluster 3, which were dominantly  
314 induced in "DAD2" and to a lesser extent in "pneumonia" showed enrichment of myeloid  
315 (cluster 3a) and epithelial cell types (cluster 3b). Top induced genes in cluster 3a were the  
316 myeloid cell specific genes *siglec-1*, *CD11c* and complement factor *C1q*. Top induced genes in  
317 cluster 3b consisted of *keratin 6A*, *collagen XVII*, the tyrosine kinase signaling protein *cbl-c* and  
318 beta-1,3-N-acetylglucosaminyltransferase 3 (*b3gnt3*), typically expressed in epithelia and also  
319 involved in lymphocyte trafficking and homing. Cell types in cluster 4, strongly increased in  
320 "pneumonia" consisted of different leukocyte classes including B-, T-cells and (neutrophilic)  
321 granulocytes. Top induced genes consisted of the interleukin 8 receptor genes *cxcr1* and *cxcr2*,  
322 the chemokine receptor type 2 (*CCR2*), *CEACAM3*, *CD22* (B cell marker), and the cell surface  
323 receptors *TREML2* and *FCGR3B*.

324 In summary, cellular deconvolution clearly sub-stratified the major categories DAD and  
325 pneumonia of covid-19 lung pathology. Noteworthy, DAD subclustered into two different  
326 groups, one showing mainly induction of vascular and stromal cell elements ("DAD1"), the  
327 other dominant induction of genes related to myeloid and epithelial cells ("DAD2"), and this  
328 subgroup showed more commonalities with the pneumonia group.

329

### 330 **Macrophages, complement c1q and immune impairment in covid-19 lungs**

331 Myeloid cells including macrophages play a central role in the pathogenesis of DAD  
332 [22-24], and bronchioloalveolar lavage fluids (BALF) of patients with severe covid-19 show



333 high proportions of macrophages [15, 25]. We confirmed significantly increased macrophages  
334 in covid-19 lungs by CD163 Immunohistochemistry, a M2-type macrophage marker (Figure  
335 6A), corroborating a recent proteomic study wherein CD163 was found amongst the most  
336 induced proteins in lungs and spleens derived from covid-19 autopsies [18]. Deconvolution  
337 indicated both M1- and M2-type macrophages significantly enriched predominantly in  
338 "DAD2" whereas monocytes were mainly induced in the "pneumonia" group (Figure 6B).  
339 Increased CD163 positive macrophages gathering around virus positive cells were recently  
340 shown also in a macaque model of SARS-CoV infection, indicating that infected pneumocytes  
341 may lead to macrophage recruitment in coronavirus infections [26].

342         Among the most discriminative genes between DAD subtypes we found complement  
343 factor *C1q* dominantly induced in "DAD2" (Figure 5C). Complement activation is implicated in  
344 DAD pathogenesis and linked to severe covid-19 [27-29]. Other complement factors showed  
345 no discriminative expression pattern between pathological subgroups in our cohort, except  
346 certain complement receptors and properdin mainly induced in pneumonia cases (Figure 6C).  
347 Western blots generated from protein extracts of lungs confirmed significantly increased C1q  
348 (Figure 6D). A major source of C1q are macrophages corroborated also by a recent single-cell  
349 transcriptomic analysis of covid-19 lungs (Figure S11) [30, 31] suggesting a strong connection  
350 between macrophages and complement C1q in covid-19 [32]. Immunohistochemical analysis  
351 of lung tissues with a C1q antibody showed staining of the vasculature, the interstitial and  
352 alveolar space but also of alveolar cells including macrophages and pneumocytes, indicating a  
353 multifaceted deposition of C1q in the context of covid-19 in our series (Figure 6E).

354

355

356

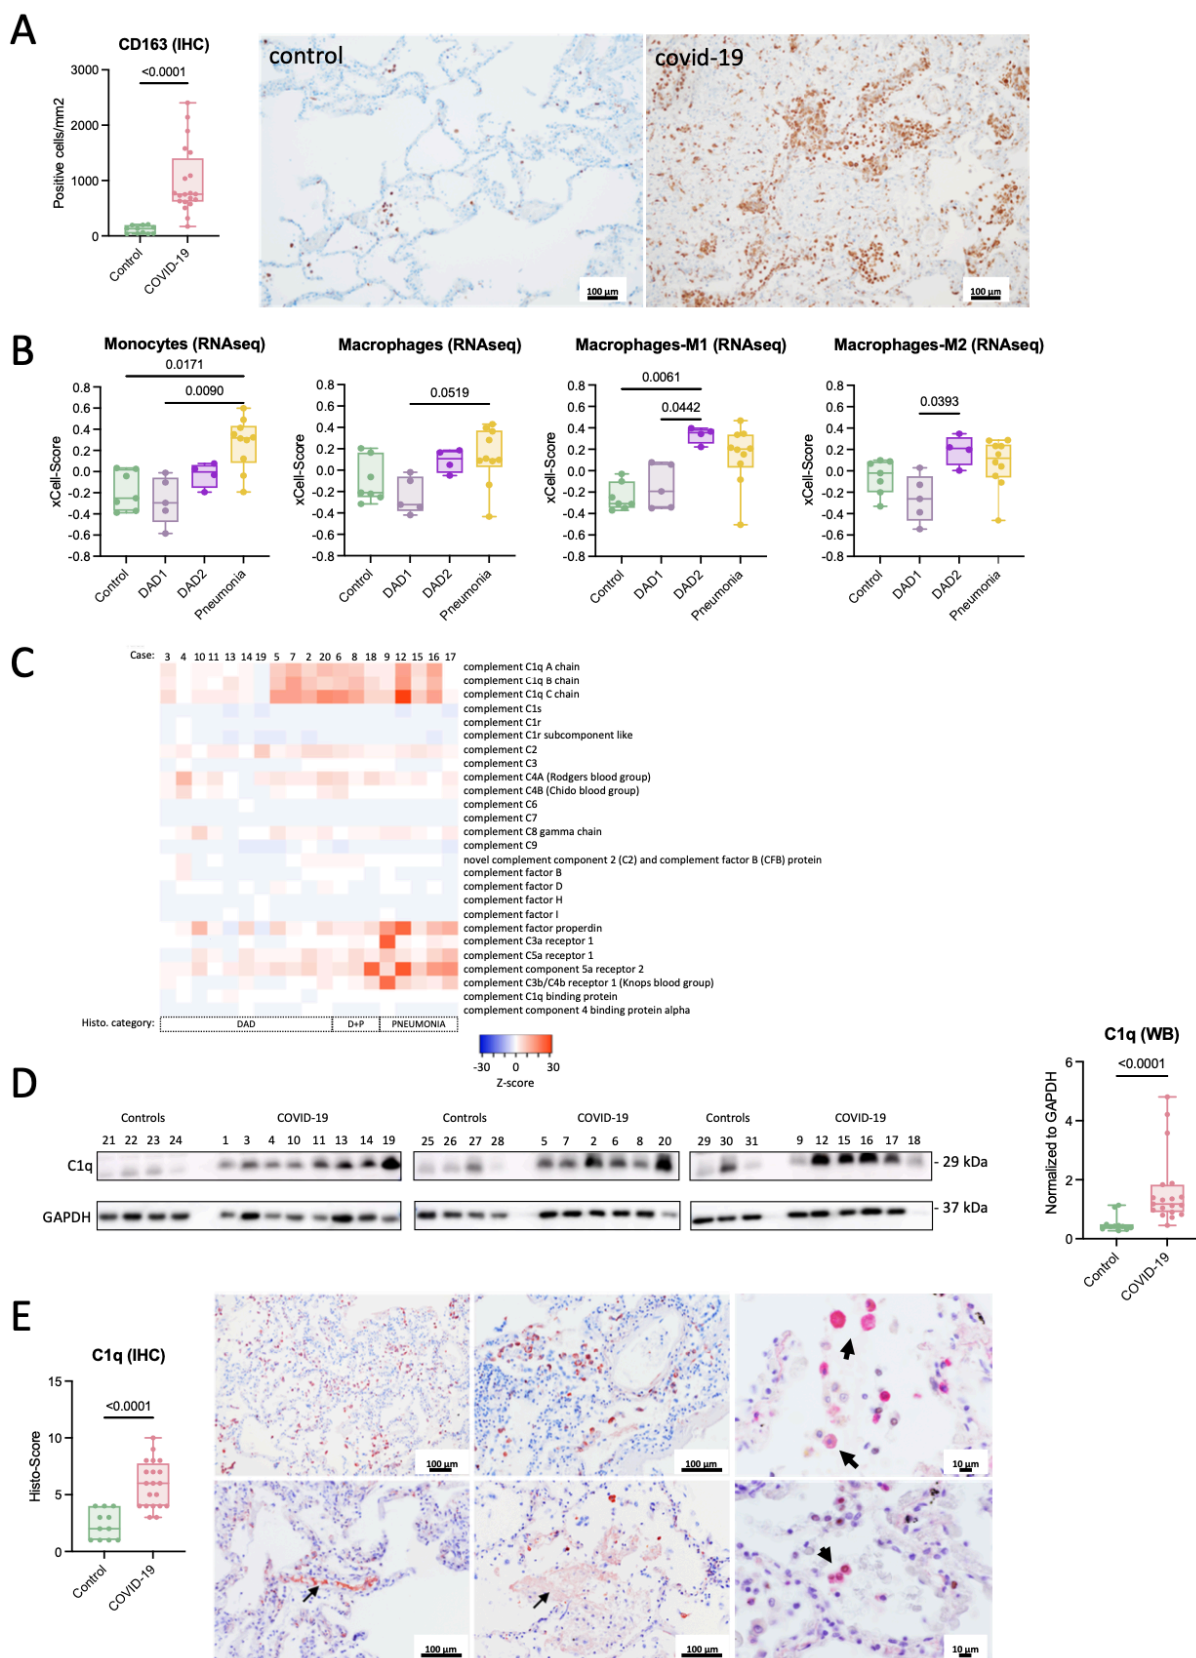

357

358 **Figure 6. Macrophage and complement C1q induction in covid-19 lungs.** (A)  
 359 Immunohistochemical counting of CD163 positive macrophages shows induction in covid-19  
 360 compared to controls (Mann-Whitney test). (B) Both M1 and M2 macrophages are specifically  
 361 increased in "DAD2" compared to "DAD1" (grouping according to xCell analysis; Kruskal-Wallis  
 362 test).

363 and in pneumonia. (D) C1q protein (29 kDa) is significantly increased in covid-19 lung tissue  
364 compared to controls (reference human GAPDH; Mann Whitney test). (E) Significant Induction  
365 of C1q detected by immunohistochemistry (Mann Whitney test) and different staining  
366 patterns in covid-19 lungs; top left & middle: C1q staining of alveolar cells; top right: double  
367 immunohistochemistry staining (red: C1q, nuclear black: TTF-1) shows C1q staining of alveolar  
368 macrophages; bottom left: intravascular C1q staining; bottom middle: free C1q specific  
369 staining of proteinaceous fluid in the alveolar space; bottom right: double  
370 immunohistochemistry staining (red: C1q, nuclear black: TTF-1) shows C1q staining of  
371 pneumocytes (TTF-1 positive) .  
372

373 C1q is the initiating component of the classical complement cascade but exhibits also immune  
374 regulatory functions. It induces the development of pro-resolving M2 type macrophages and  
375 is involved in the clearance of apoptotic and necrotic cells, which are highly increased in covid-  
376 19 lungs [33-35]. In this process C1q binds to cellular break-down products and is subsequently  
377 recognized by phagocyte receptors like the leukocyte-associated immunoglobulin-like  
378 receptor 1 (LAIR-1; syn.: CD305) conferring uptake and triggering a tolerogenic state in the  
379 phagocyte [36, 37]. As shown by a recent single-cell transcriptomics analysis of covid-19 lungs,  
380 *LAIR-1* is mainly present in macrophages (Figure S12) [17]. LAIR-1 together with *LILRB4*  
381 (leukocyte immunoglobulin-like receptor subfamily B member 4; syn.: *ILT3*) belong to  
382 immunoglobulin-like receptors recognizing collagen domains such as present in C1q, thereby  
383 inhibiting immune activation [38, 39]. RNAseq confirmed significant induction of *LAIR-1* and  
384 *LILRB4* dominantly in "DAD2" followed by "pneumonia" (Figure 7A). Expressions of all 3 *C1q*  
385 polypeptide chains (*A*, *B* & *C*) significantly correlated with *LAIR-1* and *LILRB4* expression but  
386 not with induced collagens (Figures 7B and S13). This might suggest a functional link between  
387 C1q and the immune inhibitory receptors LAIR-1 and LILRB4.

388

389

390

391

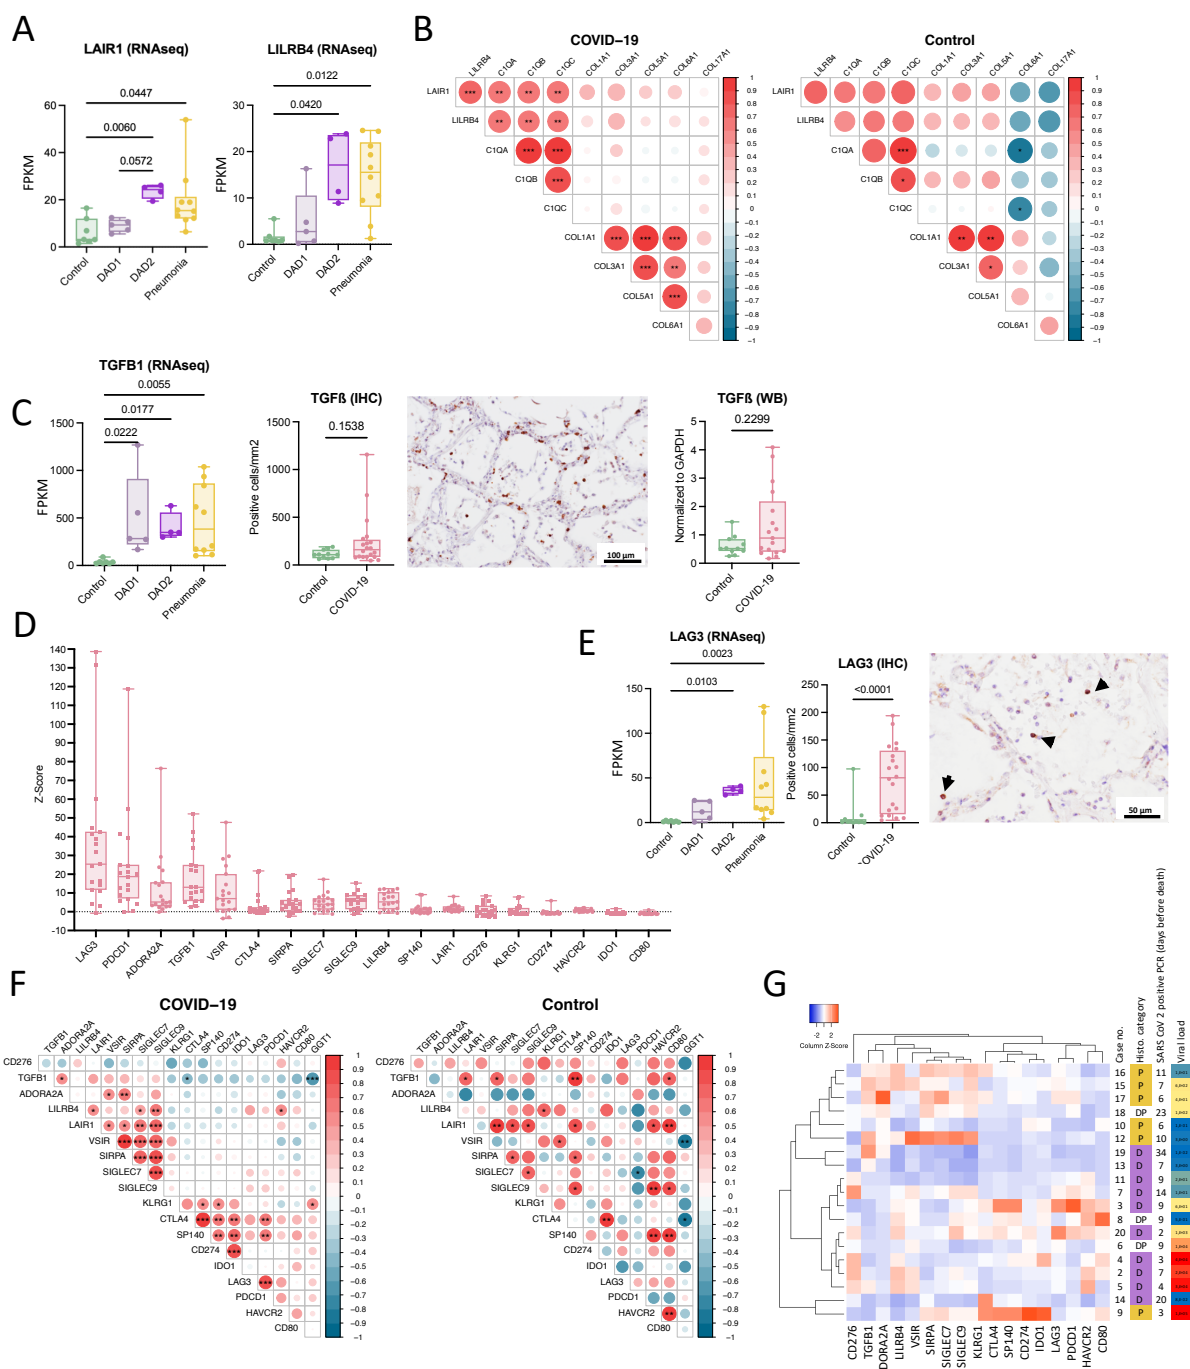

392

393 **Figure 7. Signatures of immune-impairment in covid-19 lungs.** (A) The tolerogenic leukocyte  
 394 receptors *LAIR-1* and *LILRB4* are mainly induced in "DAD2" and "pneumonia" (Kruskal-Wallis  
 395 test). (B) Spearman correlation of RNA expression of *LAIR-1* and *LILRB4* with *C1q* chains and  
 396 induced collagen types (Spearman R;  $p^* < 0.05$  to  $p^{***} < 0.001$ ). (C) Significant induction of  
 397 *TGFβ1* transcription (Kruskal-Wallis test). Protein measurement by immunohistochemistry  
 398 and Western blotting does not show a significant difference of covid-19 lungs to controls  
 399 (Mann-Whitney test). (D) Strong induction of immune checkpoint inhibitors in covid-19 (order  
 400 according to z-score). (E) *LAG3* transcriptional induction (Kruskal-Wallis test) and increased  
 401 lymphocyte staining with immunohistochemistry in covid-19 lung tissue (Mann-Whitney test).  
 402 (F) Simultaneous transcriptional induction of immune checkpoint inhibitors in covid-19 lungs  
 403 compared to controls (Pearson correlation;  $p^* < 0.05$ ,  $p^{***} < 0.001$ ). (E) Hierarchical clustering

404 of immune checkpoint inhibitors of covid-19 cases shows a separate grouping of samples with  
405 high viral loads (transcript abundance) versus samples with the histological pneumonia  
406 category (clustering: average linkage; distance measure: Pearson).  
407

408 Since the development of secondary infections is likely driven by local immune-impairment  
409 we screened for other anti-inflammatory markers. TGF- $\beta$ 1 is a key factor in the development  
410 and healing response of ALI and also implicated in covid-19 lung pathology [40, 41]. *TGF- $\beta$ 1*  
411 transcription was significantly increased in covid-19, showing a huge variability, however, TGF-  
412  $\beta$ 1 protein measured by immunohistochemistry and western blotting showed no significant  
413 induction compared to controls (Figures 7C and S14). Since several immune and non-immune  
414 cell types are able to produce TGF- $\beta$ 1, the observed variability in expression might reflect the  
415 temporal heterogeneity of lung pathologies in our cohort. Induction of certain inhibitory  
416 immune-checkpoints is reported in covid-19 [42-46]. We confirmed transcriptional induction  
417 of several inhibitory immune-checkpoints in covid-19 lungs (*LAG3*, *PDCD1*, *ADORA2A*, *VSIR*,  
418 *CTLA4*, *SIRPA*, *LAIR1*, *SIGLEC9*, *LILRB4*, *SIGLEC7*, *HAVCR2*), whereas some showed no induction  
419 (*CD276*, *SP140*, *IDO1*, *KLRG1*, *CD274*) or were even reduced (*GGT1*, *CD80*) compared to  
420 controls (Figures 7D and S15). Noteworthy, the top induced inhibitory immune-checkpoint  
421 was found to be *LAG3* (lymphocyte-activation gene 3; syn.: CD223), dominantly induced in  
422 "DAD2" and "pneumonia" based on RNAseq, which was also confirmed by  
423 immunohistochemistry wherein mainly lymphocytes showed strong staining signals (Figures  
424 7E and S16). *LAG3* was recently described as a major increased factor in a plasma proteomic  
425 study of severe covid-19 [47]. During immune exhaustion multiple inhibitory receptors act  
426 often in synergy amplifying immune impairment, like *LAG3* and *PD-1* co-induced during  
427 chronic viral infections [48]. We confirmed synergistic induction of several inhibitory immune-  
428 checkpoints in covid-19 lungs, which showed a different costimulatory pattern compared to  
429 controls (Figure 7F). Interestingly, co-expression patterns discriminated cases with high viral

430 loads (*KLRG1, CTLA4, SP140, CD274, IDO1, LAG3, PDCD1, HAVCR2, CD80*) from samples with  
431 pneumonia (*CD276, TGFB1, ADORA2A, LILRB4, LAIR1, VSIR, SIRPA, SIGLEC7, SIGLEC9*)  
432 suggesting a divergent pattern of induction of inhibitory immune-checkpoints during the  
433 course of covid-19 lung pathology (Figure 7G). In summary, these data highlight that multiple  
434 pillars of immune impairment act in severe covid-19, leading to a reduced antimicrobial  
435 defense in lungs driving the development of secondary infections. The molecular dissection of  
436 cell types and immune inhibitory signals might enable the development of specific measures  
437 counteracting this potentially lethal complication.

438

## 439 Discussion

440 We performed a systematic autopsy study of 20 consecutive covid-19 cases and 14  
441 controls to gain unbiased information about lethal disease courses from the early pandemic.  
442 Integration of autopsy, cultivation and deep sequencing provided important clues about host  
443 and microbial factors involved in the development of secondary infections as a major sequel  
444 of lethal covid-19. Thus, our study might serve as a blue-print for a "holistic" autopsy approach  
445 tempting to gain relevant pathophysiological insights from a newly emerging disease. Viral  
446 genotyping facilitated directly from autopsy material provided epidemiologic clues about  
447 transmission and captured already early events of viral genetic adaptation. Noteworthy, a  
448 significant proportion of corpses yielded cultivable SARS-CoV-2 indicating that autopsy might  
449 facilitate virus spread and that special safety requirements should be applied during post-  
450 mortem examinations of covid-19 patients [49]. Our investigation showed that covid-19 lung  
451 pathology is multifaceted and that a major discriminator of lethal courses is DAD and the  
452 presence of secondary infections. This was evident by histology but also mirrored by the deep  
453 transcriptomic analysis and microbiology. Secondary infections are reported to develop in up

454 to 42% of patients with covid-19 [7]. Notably, DAD caused by the virus itself and secondary  
455 infections are chronologically divergent and provoke overtly different host reactions.  
456 Noteworthy, SARS-CoV-2 infection alone might not trigger prominent neutrophil recruitment  
457 to the lung at all and neutrophil signatures found in recent covid-19 studies might likely  
458 already indicate secondary infections [15, 18, 31, 50, 51]. Thus, it is important to seek for a  
459 proper pre-classification of tissue samples based on histology to omit wrong conclusions in  
460 omics-based analyses.

461         The resident lung microbiome is a relevant factor in the pathogenesis of lung infections  
462 and reported to be altered in sepsis and DAD [9, 10]. Secondary lung infections are also a  
463 complication in influenza, SARS and MERS, wherein bacteria like *S. aureus* or *Klebsiella* spp.  
464 and fungi like *Candida* or *Aspergillus* spp. are emerging [13, 14]. Such microbial agents were  
465 also prevalent in our cohort. Curiously, the mechanistic understanding why secondary  
466 infections develop on top of viral infections is still limited. We could not identify any associated  
467 clinical parameter clearly correlated with secondary infections but showed that lung immunity  
468 is impaired in covid-19, which might drive these infections. This finding was also underscored  
469 by the presence of polymicrobial infections and EBV indicative for a general decreased  
470 immunity [12]. Immune exhaustion seems to follow the systemic immune hyperactivation in  
471 severe covid-19 and myeloid cells, which are important for the recognition of virus infected  
472 cells seem to be key for initiating the proinflammatory response [52, 53]. Recent single-cell  
473 transcriptomic studies of covid-19 patients identified myeloid cells as a major induced cell  
474 type in BALF specimens with high proportions of proinflammatory macrophages [15, 50].  
475 Generally, M1-type macrophages dominate early DAD, whereas later DAD stages show  
476 increased M2-types involved in tissue repair with immunosuppressive features [23]. Thus,  
477 later (organizing) phases of DAD might be specifically prone to acquire secondary infections.

478 Respiratory failure in covid-19 is linked to strong complement activation [27, 28, 54]. Extensive  
479 deposition of complement factors, including C1q, in vessels and epithelial cells of lungs and  
480 skin was reported in covid-19 [55, 56]. Notably, the SARS-CoV-2 spike-protein might directly  
481 activate complement via the alternative pathway [57]. Complement in covid-19 is currently  
482 discussed mainly in the context of endothelial injury and fibrin-clot formation [29]. Our study  
483 suggests another pathophysiological role, wherein C1q and macrophages might perpetuate  
484 immune impairment. Immune complexes formed by viral antigens and antibodies can activate  
485 factor C1 as shown in SARS-CoV infection [58]. C1q is involved in the clearance of apoptotic  
486 and necrotic cells by phagocytes, a process termed efferocytosis [59]. Apoptosis and necrosis  
487 are prominent in covid-19 lungs [33, 34, 47]. During efferocytosis suppression of  
488 overwhelming inflammation is important and phagocytes involved in this process are  
489 producing anti-inflammatory cytokines. Therefore, C1q binds to molecules released from  
490 apoptotic and necrotic cells (e.g. phosphatidylserine, nucleic acids, etc.) and these complexes  
491 are recognized by receptors present on phagocytes, like LAIR-1, conferring uptake and  
492 inducing a tolerogenic state [30, 35-37]. Noteworthy, binding of C1q to LAIR-1 on plasmacytoid  
493 DCs restricts the production of type I interferons impairing antiviral defense, which also occurs  
494 in covid-19 [36, 39]. The "DAD2" subtype in our study shows increased macrophages, C1q and  
495 LAIR-1 and might therefore represent cases with a lowered immune tone prone for the  
496 development of secondary infections. Overall the progression of early (exudative) DAD into  
497 late (fibrotic) DAD indicates healing of ALI characterized by significant connective tissue  
498 remodeling and a reduced inflammatory tone [60, 61]. Immune suppressive factors such as  
499 TGF- $\beta$ 1 are known to be involved in this process and also LAIR-1 and LILRB4 recognizing  
500 collagens or collagen-like proteins might act anti-inflammatory during this disease phase [39,  
501 62-65]. Moreover, the synergistic induction of several tolerogenic factors including inhibitory



502 immune-checkpoints [42-47, 66] and increased (apoptotic) cell death of immune-cells [67, 68]  
503 altogether perpetuate immune failure in covid-19.

504         The limitations of our descriptive study are that causalities cannot be directly inferred  
505 and that the relatively small cohort cannot show the entire picture of severe covid-19 and  
506 associated secondary infections. Varying clinical courses and different comorbidities might  
507 also have influenced our findings. In addition, treatment of covid-19 has changed since the  
508 early pandemic, thus, current severe courses and developing sequels might also have  
509 changed. We also cannot be sure whether the two described forms of DAD might represent  
510 just a spectrum of pathophysiological states or are specific pathotypes. Moreover, post-  
511 mortem effects like RNA degradation might have introduced additional noise in our  
512 investigation. Nevertheless, we found autopsy complemented with microbiology and  
513 molecular measures as a powerful tool to gain relevant clues about covid-19 pathophysiology.  
514 Importantly, there exists an obvious knowledge gap in the understanding of the molecular  
515 mechanisms driving the development of secondary infections on top of in viral lung diseases.  
516 This should initiate further studies to understand the molecular pathways in more detail and  
517 to unravel chronological phases of immuno-suppression which could also lead to development  
518 of rational therapies counteracting this sequel not only in covid-19. For these investigations,  
519 autopsy specimens and associated molecular data might serve as a valuable resource.

520

## 521 **Material and Methods**

### 522 **Autopsy procedure & specimen collection**

523 Autopsies were performed according to CDC guidelines  
524 (<https://www.cdc.gov/coronavirus/2019-ncov/hcp/guidance-postmortem-specimens.html>)  
525 and the epidemic response plan of the county of Styria in a BSL-3 facility that has been  
526 specifically designed for post-mortem examinations and sample collection [49]. Full autopsies  
527 were performed and swabs (eSwab, Copan), tissue and body fluid samples were taken. Tissues  
528 were immediately fixed in 10% buffered formalin (for histology) or 2,5% buffered (sodium

529 cacodylate; pH 6.5; Sigma) glutaraldehyde (for electron microscopy), snap frozen in liquid  
530 nitrogen or preserved in RNAlater (ThermoFisher) and stored at -80°C until further processing.

531

### 532 **Histopathology and immunohistochemistry**

533 Formalin-fixed paraffin-embedded (FFPE) tissue specimens were processed and stained  
534 according to standard procedures. Stains consisted of hematoxylin & eosin (H&E), periodic  
535 acid–Schiff (PAS), chromotrope aniline blue (CAB), sirius red, Gomori, Prussian blue, Giemsa  
536 and toluidine blue. Chronic renal changes involving the individual renal compartments were  
537 scored according to Sethi et al. [69]. Liver fibrosis was scored according to Ishak et al [70]. The  
538 following antibodies were used: Anti-SARS-CoV-2 nucleoprotein (NP) antibody (clone ID: 019,  
539 dilution 1:100, rabbit IgG; Sino Biological, Beijing; detection-system: Dako REAL™ EnVision  
540 TM HRP rabbit/mouse Dako K5007); CD68 (Ventana anti-CD68 (KP-1) monoclonal mouse 790-  
541 2931; detection-system: Ventana Ultra View DAB); TTF1 (Cell marque 343M-96 Clone  
542 8G7G3/1 monoclonal mouse 1:200; detection-system: Dako K5007); TGFβ1 (Santacruz  
543 polyclonal rabbit AB; clone SC-146 1:50; detection-system: Ventana Ultra View DAB); LAG3  
544 (Abcam polyclonal rabbit; clone ab180187 1:5000; detection-system: Dako K5007); C1q (Dako  
545 polyclonal rabbit, clone A0136 1:5000; detection-system: Dako K5007); CD163 (Ventana  
546 monoclonal mouse, clone MRQ-26 1:50; detection-system: Ventana Ultra View DAB). RNA in-  
547 situ hybridization for EBV was performed with the Inform EBER Epstein Barr Virus early RNA  
548 kit (Ventana 800-2824) and the detection-system ISH invers blue (Ventana).

549

### 550 **Scoring of histological lung features**

551 From each case multiple specimens from each lobe were taken to account for variations in  
552 disease representation (at least 2 specimens per lobe corresponding to 10 specimens per case  
553 at least, mean: 13, range: 10-21) and assessed for histopathological features. Features were  
554 grouped according to (a) early (exudative) and (b) late (fibrotic) DAD as well as (c) general  
555 cellular and tissue reactions in pulmonary pathology and DAD development [21] and consisted  
556 of: Interstitial edema/thickening of the alveolo-capillary membranes (non-fibrotic); alveolar  
557 edema; hyaline membranes; intra-alveolar (loose) fibrin; scaled of pneumocytes; intra-  
558 alveolar proliferation of pneumocytes; alveolar septal fibrosis (early stage organizing DAD);  
559 alveolar septal fibrosis (end stage organizing DAD); bronchialisation; squamous metaplasia;  
560 virus induced cellular changes in pneumocytes and/or alveolar macrophages; alveolar  
561 hemorrhage; interstitial hemorrhage; interstitial hemosiderin (free); alveolar hemosiderin  
562 (siderophages); fibrin thrombi (capillaries); fibrin thrombi (larger vessels); vascular remodeling  
563 (increased density, vascular fissures); intra-alveolar macrophage accumulation; lymphocytes  
564 (within alveolo-capillary membranes); lymphocytes (within interstitial space); intra-alveolar  
565 (fibro-) cellular infiltrate; lymphocytes (alveolar); megakaryocytes (capillaries); alveolar  
566 neutrophils; bronchial neutrophils; a 4-grade scoring system was used to describe the severity  
567 of the different pathological features. Score 0 (feature absent), score 1 (feature present in  
568 ≤33%), score 2 (feature present in ≤66%), score 3 (feature present in > 66%). Scores per  
569 slides were summed up and a final score (mean value) was calculated.

570

### 571 **Microbial culture and identification**

572 Native lung tissues were transferred into mixing vessels (ProbeAX; AxonLab) containing 5 ml  
573 of physiological saline and were homogenized using a dispersion instrument (ULTRA-TURRAX®  
574 Tube Drive; AxonLab). The homogenates were inoculated (0.1 ml aliquots) onto aerobic blood  
575 agar, MacConkey agar, chocolate agar, and anaerobic blood agar (BD Diagnostic) and into  
576 thioglycollate broth (Oxoid). Plates were incubated at 35°C and 37°C aerobically, in an

577 atmosphere containing 5 % carbon dioxide and anaerobically (Genbox anaer, bioMérieux) for  
578 up to 14 days, respectively. Cloudy thioglycollate broths were sub-cultured on plates. Colonies  
579 were identified using matrix-assisted-laser-desorption-ionization time-of-flight mass-  
580 spectrometry (MALDI-TOF MS; Vitek<sup>®</sup> MS, bioMérieux or MALDI Biotyper<sup>™</sup>, Bruker) or 16S  
581 rRNA gene sequencing [71].

582

### 583 **Virus isolation**

584 Lung tissues and swabs from lung parenchyma were used for cultivation of SARS-CoV-2 (Table  
585 S3). After mechanical disruption samples were frozen (-80°C) and thawed (37°C) twice to  
586 increase cell lysis and viral release. 2mL OptiPro SFM medium (Gibco) with 4mM L-Glutamine  
587 (Gibco) and 1% penicillin-streptomycin (10,000 U/ml; Gibco) were added to the samples. After  
588 centrifugation (10 min., 1500 rcf) the supernatants were filtered through a 0.45µm membrane  
589 filter (Millipore) and inoculated on Vero CCL-81 cells with OptiPro SFM medium with 4mM L-  
590 Glutamine and 1% penicillin-streptomycin in T25 flasks (ThermoFisher). After 3-4 days  
591 incubation at 37°C and 5% CO<sub>2</sub>, the whole cells were mechanically detached with cell scrapers  
592 and passaged including the supernatant on to new Vero CCL-81 cells growing in T75 flasks  
593 (ThermoFisher). After 1 week the cells were harvested and supernatants were stored after  
594 centrifugation (10min., 1500 rcf) at -80°C. Viral load was determined by qRT-PCR as described  
595 below.

596

### 597 **RNA extraction**

598 Samples consisted of swabs (eSWAB, Copan), tissues and body fluids, the latter were collected  
599 with sterile syringes. Fresh tissues were sampled directly into Magna Lyser Green Beads tubes  
600 (03358941001, Roche) pre-filled with 400µl lysis buffer. Tissues were homogenized with a  
601 MagnaLyser (Roche) instrument using 6500 rpm for 30 sec. and 3 repetitions. RNA was  
602 extracted from 200µl eSwab solution, 200µl liquid sample or tissue homogenate using the  
603 Maxwell 16 LEV simplyRNA Blood Kit (AS1310, Promega) according to the manufacturer's  
604 instructions. RNAs from VeroE6 cell cultures were isolated by using the QIAamp Viral RNA Mini  
605 Kit (Qiagen) without addition of carrier RNA and transcribed into cDNA with the High-Capacity  
606 cDNA Reverse Transcription Kit with RNase Inhibitor (Applied Biosystems) according to  
607 manufacturer's instructions.

608

### 609 **SARS-CoV-2 quantitative RT-PCR**

610 qRT-PCR was performed using a RdRP gene assay and with a probe specific to SARS-CoV-2  
611 [72]. Briefly, primers, probes and 5µl of RNA were added to 10µl of SuperScript III One-Step  
612 RT-PCR System with Platinum Taq High Fidelity DNA Polymerase mastermix (ThermoFisher).  
613 PCR was performed on a Quantstudio 7 instrument (ThermoFisher) with the following cycling  
614 conditions: 55°C for 15 min, 95°C for 3 min; 45 cycles consisting of 95°C for 15sec and 58°C for  
615 30sec. Amplification data was downloaded and processed using the qpcR package of the R  
616 project (<https://www.r-project.org/>). Amplification efficiency plots were visually inspected  
617 and Cp2D (cycle peak of second derivative) values were calculated for samples with valid  
618 amplification curves. Plots were generated with R using the reshape, tidyverse and ggplot  
619 packages. qRT-PCR of virus cultures employed primer sets recommended by the CDC detecting  
620 three different regions of the viral nucleocapsid (2019-nCoV N1-F 5'-GAC CCC AAA ATC AGC  
621 GAA AT-3', 2019-nCoV,\_N1-R 5'-TCT GGT TAC TGC CAG TTG AAT CTG-3'; 2019-nCoV\_N2-F 5'-  
622 TTA CAA ACA TTG GCC GCA AA-3', 2019-nCoV\_N2-R 5'-GCG CGA CAT TCC GAA GAA-3'; 2019-  
623 nCoV\_N3-F 5'-GGG AGC CTT GAA TAC ACC AAA A-3', 2019-nCoV\_N3-R 5'-TGT AGC ACG ATT  
624 GCA GCA TTG-3') and human RNase P as a control (2019-nCoV\_RP-F 5'-AGA TTT GGA CCT GCG

625 AGC G-3', 2019-CoV\_RP-R 5'-GAG CGG CTG TCT CCA CAA GT-3') or GAPDH (GAPDH\_f 5'-  
626 CCTCCACCTTTGACGCT-3', GAPDH\_r 5'-TTGCTGTAGCCAAATTCGTT-3') as control. PCR was  
627 performed with the SYBR Green PCR Mastermix (Applied Biosystems) on a Quantstudio 7  
628 instrument (ThermoFisher) with the following cycling conditions: 25°C for 2 min, 50°C for 15  
629 min, 95°C for 10min, 45 cycles consisting of 95°C for 3sec and 55°C for 30 sec.

630

### 631 **Viral genome sequencing**

632 PCR primers spanning the whole genome of SARS-CoV-2 were designed yielding in about 2kb  
633 amplicons (Table S9). 2.5µl of RNA were used in three separate RT-PCR reactions as described  
634 above with oligonucleotide primers at 400nM concentration with the following cycling  
635 conditions: 55°C for 15 min, 95°C for 3 min; 35 cycles consisting of 95°C for 15 sec and 57°C  
636 for 3 min; final extension at 72°C for 10 min. PCR products were combined and purified by  
637 incubation with 1.8X Ampure XT beads (Beckman Coulter) followed by two washes with 75%  
638 ethanol and elution in 30µl water. Amplicons were fragmented to 150-250bp length and Ion  
639 Torrent barcode and sequencing adapters were ligated to the fragments using the NEBNext  
640 Fast DNA Fragmentation & Library Prep Set for Ion Torren kit (New England Biolabs) according  
641 to the manufacturer's recommendations. Libraries were sequenced on an Ion Torrent S5XL  
642 instrument using a 540 Chip Kit and the 200bp sequencing kit (ThermoFisher). Sequences were  
643 aligned to the SARS-CoV-2 reference genome (acc. no.: NC\_045512.2) using TMAP (v5.10.11)  
644 and variants were called with the Torrent Variant Caller (v5.10-12). All called variants were  
645 visually inspected and consensus sequences of the viral genomes were generated with  
646 bcftools (v1.3.1). Consensus sequences were aligned using clustalw (v2.1), guide trees were  
647 visualized in figtree (v1.4.4) and final adjustments were made with IncScape (v0.92). SARS-  
648 CoV-2 genomes from our study were uploaded and analyzed with the GISAID SARS-CoV-2  
649 (hCoV-19) database which can be accessed via [https://www.gisaid.org/epiflu-](https://www.gisaid.org/epiflu-applications/next-hcov-19-app/)  
650 [applications/next-hcov-19-app/](https://www.gisaid.org/epiflu-applications/next-hcov-19-app/) [73, 74].

651

### 652 **RNA sequencing**

653 Libraries for RNA sequencing (RNAseq) from lung tissues (19 covid-19 cases #2-#20 and 7  
654 control cases #21, #23-#28) were prepped with the KAPA RNA HyperPrep Kit with RiboErase  
655 (HMR) for Illumina® platforms (KAPABIOSYSTEMS) according to the manufacturers protocol.  
656 Slight modifications from the protocol consisted of a fragmentation step at 65°C for 1min, 12  
657 cycles of PCR, as well as an additional bead cleanup at the end of the prep. Libraries were  
658 pooled in two pools of 13 samples each by concentration measured with Qubit  
659 (ThermoFisher), followed by a bead-cleanup step and an additional QC with Qubit  
660 (ThermoFisher) and BioAnalyzer (Agilent). Sequences were resolved on a NovaSeq 6000  
661 Sequencer (Illumina) with a standard paired-end protocol. RNAseq data were aligned to the  
662 human reference genome using STAR [75] (GRCh38 assembly, Ensembl V99 gene models) in  
663 2-pass mode with the following parameters: -sjdbOverhang 100 -outFilterMultimapNmax 20  
664 -outFilterMismatchNoverLmax 0.05 -outFilterScoreMin 0 -outFilterScoreMinOverLread 0 -  
665 -outSJfilterReads Unique -outSJfilterOverhangMin 20 15 15 15 15 -outSJfilterCountUniqueMin  
666 3 3 3 3 -outSJfilterCountTotalMin 3 3 3 3 -outSJfilterDistToOtherSJmin 0 0 0 0 --  
667 -outSJfilterIntronMaxVsReadN 100000 -alignIntronMin 20 -alignIntronMax 100000 --  
668 -alignMatesGapMax 100000 -alignSJoverhangMin 12 -alignSJstitchMismatchNmax 5 -1 5 5 -  
669 -alignSJDBoverhangMin 7 -alignSplicedMateMapLmin 0 -alignSplicedMateMapLminOverLmate  
670 0.5 -limitSjdbInsertNsj 5000000 -clip3pAdapterMMp 0.5 -outSAMmultNmax 1 -  
671 -outSAMmapqUnique 60 -outFilterType BySJout -outSAMunmapped Within -outWigType  
672 bedGraph -outReadsUnmapped None SortedByCoordinate -outSAMattrIHstart 1 -

673 twopassMode Basic -chimSegmentMin 8 -chimOutType Junctions WithinBAM SoftClip -  
674 chimScoreMin 1 -chimScoreDropMax 20 -chimJunctionOverhangMin 8 -  
675 chimSegmentReadGapMax 3 -quantMode GeneCounts -outSAMstrandField intronMotif -  
676 outFilterIntronStrands None -chimMainSegmentMultNmax 2 -outSAMattributes NH HI AS nM  
677 NM MD jM jI XS ch. Alignment to the virus genome reference NC\_045512.2 was performed  
678 using bowtie2-2.4.1 [76] on all reads that did not map to the human genome. Read counts on  
679 plus-/minus-strand were counted using custom python scripts. Exact positioning of the reads  
680 on plus-/minus-strand was done splitting the bam files aligned to NC\_045512.2 using samtools  
681 -f 0x10 and samtools -F 0x10 (v0.1.19-44428cd) and bedtools genomecov -ibam BAM  
682 NC\_045512.2 -d (bedtools v2.17.0).

683

#### 684 **RNA profiling**

685 Gene counts were determined using HTSeq (v0.12.4) and normalized as fragments per  
686 kilobase per million (FPKM) after TMM correction. Gene set variation analysis (GSVA) was  
687 performed against a set of immune signatures with xCell [19] and means were calculated per  
688 cell type using custom R-scripts. Graphs and analyses were generated using R-3.6.0.  
689 Differential gene expression was conducted using edgeR  
690 (<https://doi.org/doi:10.18129/B9.bioc.edgeR>) [77]. Differentially expressed genes were  
691 selected with FDR<0.05, logCPM>1, and FPKM>1 in at least 5 samples. Clustering of  
692 differentially expressed genes was performed using hclust hierarchical clustering and  
693 subsequent cutting of the gene tree at R function cutree with h=0.25. Gene set enrichment  
694 analysis for clusters was done using the online tool ([https://www.gsea-  
695 msigdb.org/gsea/msigdb/annotate.jsp](https://www.gsea-msigdb.org/gsea/msigdb/annotate.jsp)) [78] for canonical pathways and FDR<0.05.

696

#### 697 **Single cell transcriptomic metanalysis**

698 Selected genes from single-cell transcriptomic metadata from Xu et al [31] and Delorey et al  
699 [17] were analyzed with the single-cell atlas database SCovid [79].

700

#### 701 **Microbiome analysis based on RNAseq**

702 Microbiome analysis was performed with the following steps using all reads from STAR  
703 alignment not mapping to the human reference: quality filtering using fastx -q 30 -p 26 -Q33  
704 (v0.0.13, [http://hannonlab.cshl.edu/fastx\\_toolkit/](http://hannonlab.cshl.edu/fastx_toolkit/)), cleaning of the fasta file using seqclean-  
705 x86\_64 -N -M -A (<https://sourceforge.net/projects/seqclean/>), realigning to the human  
706 reference using blastn against all databases and removal of all reads with 94% similarity.  
707 Remaining reads were annotated using MetaPhlan2 (v2.6.0) [80] and Pathseq (GATK v4.1.0.0)  
708 [81] with default settings.

709

#### 710 **Microbiome analysis based on the 16S rRNA gene and internal transcribed spacers (ITS)**

711 Bacterial (16S rRNA gene) and fungal (ITS) microbiome analysis from lung tissue was done  
712 from FFPE samples which enabled us to preselect samples based on histology showing  
713 unambiguous pathology (i.e. DAD vs. pneumonia). DNA was extracted from FFPE tissues using  
714 the Maxwell 16 Tissue DNA Purification Kit (Promega). DNA concentration was measured by  
715 Picogreen fluorescence. The variable V1-V2 region of the bacterial 16S rRNA gene was  
716 amplified with PCR from 50ng DNA using oligonucleotide primers 16s\_515\_S3\_fwd: 5'-  
717 TGCCAGCAGCCGCGTAA-3' and 16s\_806\_S2\_rev: 5'-GGACTACCAGGGTATCTAAT-3'. This 16S  
718 rDNA region was chosen since it gives robust taxonomic classification and has been shown to  
719 be suitable for community clustering. Likewise, fungal ITS sequence was amplified with  
720 primers ITS1 5'-TCCGTAGGTGAACCTGCGG-3' and ITS2 5'-GCTGCGTTCTTCATCGATGC-3'. DNA

721 was amplified with the 16s Complete PCR Mastermix Kit (Molzym). The first PCR reaction  
722 product was subjected to a second round of PCR with primers fusing the 16s/ITS primer  
723 sequence to the A and P adapters necessary for Ion Torrent sequencing while additionally  
724 including a molecular barcode sequence to allow multiplexing of up to 96 samples  
725 simultaneously. PCR products were subjected to agarose gel electrophoresis and the band of  
726 the expected length (330nt) was excised from the gel and purified using the QiaQuick (Qiagen)  
727 gel extraction system. DNA concentration of the final PCR product was measured by Picogreen  
728 fluorescence. Amplicons from up to 60 samples were pooled equimolarly and sequencing was  
729 performed on Ion Torrent XL benchtop sequencer using the Ion 400BP Sequencing chemistry  
730 (all reagents from ThermoFisher). Sequences were split by barcode and transferred to the  
731 Torrent suite server.

732 Raw bam-files comprised of single-end reads generated by NGS, were converted from  
733 bam files to fastq.gz files by using samtools (<http://www.htslib.org/>). Quality control and  
734 preprocessing of sequences was performed using FastQC (version 0.7), MultiQC (version 1.7)  
735 and trimmomatic (version 0.36.5) using following parameters: LEADING:3 TRAILING:3  
736 SLIDINGWINDOW:4:15 MINLEN:200. Sequence processing and microbiome analysis was  
737 performed using QIIME2 (version 2020.6) [82]. After quality filtering all samples with less than  
738 9833 reads/samples were excluded from downstream analysis. In concordance with RNA-Seq  
739 analysis Covid-19 was excluded for sub-analysis (Cause of Death: Myocardial Infarction),  
740 resulting in 18 Covid and 12 control samples for 16S analysis (Average frequency: 28201.7  
741 reads/sample). For ITS analysis only 1 sample showed more than 9833 reads/per sample  
742 (Covid-19: 10272 reads). All other samples showed no clear ITS signal with a sequencing depth  
743 of maximum 219 reads per sample. Denoising, dereplication and chimera filtering of single-  
744 end reads were performed using DADA2 (denoise-pyro) [83]. 16S-based analysis was  
745 performed with the latest SILVA 138 taxonomy and the Naive Bayes classifier trained on Silva  
746 138 99% OTUs full-length sequences. For ITS-based analysis a classifier was trained on the  
747 UNITE reference database (ver8-99-classifier; 04.02.2020) according to John Quensen  
748 ([http://john-quensen.com/tutorials/training-the-qiime2-classifier-with-unite-its-reference-  
749 sequences/](http://john-quensen.com/tutorials/training-the-qiime2-classifier-with-unite-its-reference-sequences/); assessed 20/08/2020). Differences in microbial composition between groups  
750 were tested with implemented QIIME2 plugins using PERMANOVA ( $p < 0.05$ , qiime diversity  
751 beta-group-significance: Bray-Curtis, Jaccard, Unweighted UniFrac, Weighted UniFrac) and  
752 Kruskal-Wallis ( $p < 0.05$ , qiime diversity alpha-group-significance: Observed features, Shannon,  
753 Evenness, Faith PD). For metagenomic biomarker discovery taxonomic feature-tables were  
754 introduced to LEfSe (linear discriminant analysis effect size) method (Galaxy version 1.0;  
755  $p < 0.05$ , LDA > 2, All-against-all) [84]. Plots were generated with R (version 3.6.2)<sup>6</sup> in RStudio  
756 (1.1.463)<sup>7</sup> using following packages: tidyverse (1.3.0)<sup>8</sup>, qiime2r (0.99.6)<sup>9</sup>, ggplot2 (3.3.3)<sup>10</sup>,  
757 dplyr (1.0.6)<sup>11</sup> and ggpubr (0.4.0.999)<sup>12</sup> and GraphPad Prism. The graphical abstract was  
758 created with BioRender ([www.BioRender.com](http://www.BioRender.com)).

759

## 760 **Protein isolation and western blot**

761 Proteins from lung tissues were extracted with TRIzol<sup>®</sup> (ThermoFisher) according to the  
762 supplier's protocol. Briefly, tissue homogenates were subjected to phase separation wherein  
763 the organic phase containing the protein was further processed. Four volumes of ice-cold  
764 acetone were added to the organic phase and the mixture was incubated at -20°C overnight,  
765 followed by a centrifugation step (13000 rpm) at 4°C for 15 min. The supernatant was  
766 discarded and the pellets were dried at 60°C for 60 min. Subsequently 100 µl RIPA buffer  
767 (Sigma) containing protease inhibitors and phosphatase (0.1 mM Pefabloc, 1 mM DTT, 1X  
768 cOmplete<sup>™</sup> Mini, 1X PhosSTOP<sup>™</sup>) and 1 % SDS (Roche) were added and the mixture

769 incubated at 65°C for 90 min. Supernatants were transferred to a new Eppendorf tube and  
770 100 µl 8M urea in 0.05M Tris (pH 8,5) and 1% SDS were added and incubated at 55°C for 30  
771 min. Corresponding supernatants and pellets were pooled and transferred to 2 ml MagNA  
772 Lyser tubes (Roche) with ceramic beads and homogenized 2 times at 6500 rpm for 20 sec.  
773 Samples were incubated on ice for 10 min and subsequently centrifugated with 13000 rpm at  
774 4°C for 15 min. Supernatants were transferred to new Eppendorf tubes. For western blotting  
775 proteins were mixed with 4X Laemmli buffer (Bio-Rad) and incubated for 10 min at 95°C and  
776 then loaded onto 11% (v/v) SDS-PAGE gels (Amersham) and electrophoresed at 80 mA for 2 h  
777 and subsequently transferred onto nitrocellulose membranes (Amersham). Blotting efficiency  
778 was determined with Ponceau staining (Ponceau S solution, Sigma). Non-specific binding was  
779 blocked with 5% (w/v) non-fat dry milk (Bio-Rad) in TRIS-buffered saline and 0.1% (v/v) Tween  
780 20 (Merck) for 1h. Subsequently, the membranes were incubated with antibodies against C1q  
781 (Dako Denmark A/S 1:5000), TGFβ1 (Cell Signaling Technology, 1:1000), and GAPDH (Cell  
782 Signaling Technology, 1:1000) overnight at 4°C. Thereafter, membranes were washed and  
783 incubated with the appropriate HRP-conjugated secondary antibody (Amersham, ECL Anti-  
784 Rabbit IgG, 1:5000). Immunolabeling was detected using ECL Select Western Blot Reagent  
785 (Amersham) and visualized with the ImageQuant™ LAS 500 (Amersham). GAPDH was used as  
786 loading control to determine protein abundance and band density was quantified and  
787 compared by using ImageJ.

788

#### 789 **Ethics statement**

790 The study was approved by the ethics committee of the Medical University of Graz (EK-  
791 number: 32–362 ex 19/20).

792

#### 793 **Data availability**

794 The sequencing data has been deposited in ENA under the acc. no. PRJEB45873.

795

#### 796 **Acknowledgements**

797 We are grateful to Tanja V. Mascher, Birgit Gangl, Margit Gogg-Kamerer, Iris Kufferath, Sylvia  
798 Eidenhammer, Christine Langner, Stella Wolfgruber, Daniela Pabst, Helmut Donnerer and  
799 Lajos Redecsi for their technical assistance.

800

#### 801 **Funding**

802 Supported from the Medical university of Graz and the Austrian Science fund (FWF, DK-MOLIN  
803 W1241). The design of the BSL-3 laboratory used for autopsy of covid-19 cases was supported  
804 by the EU-funded program "European Research Infrastructure for Highly Pathogenic Agents"  
805 (ERINHA-Advance, Grant agreement 824061).

806

#### 807 **Author contributions**

808 Conceptualization and methodology, MZ, GG, KK, PR, KZ. Investigation and formal analysis,  
809 MZ, KK, PW, PR, MS, MN, SE, LM-M, GK, ML, AB, EL, AT, EW, SS, M-JP, F-RV, CL, BJ, LO, GG.  
810 Resources, KZ, PR, GG, BT, HL. Writing of original draft GG. Writing, review and editing, all  
811 authors. Funding acquisition, KZ, GG, HL. Supervision, GG, PR, KZ. All authors have read and  
812 agreed to the published version of the manuscript.

813

814

## 815 References

- 816 1. Hou, Y.J., et al., *SARS-CoV-2 Reverse Genetics Reveals a Variable Infection Gradient in*  
817 *the Respiratory Tract*. Cell, 2020. **182**(2): p. 429-446 e14.
- 818 2. Ramlall, V., et al., *Immune complement and coagulation dysfunction in adverse*  
819 *outcomes of SARS-CoV-2 infection*. Nat Med, 2020. **26**(10): p. 1609-1615.
- 820 3. Lowery, S.A., A. Sariol, and S. Perlman, *Innate immune and inflammatory responses*  
821 *to SARS-CoV-2: Implications for COVID-19*. Cell Host Microbe, 2021. **29**(7): p. 1052-  
822 1062.
- 823 4. Blanco-Melo, D., et al., *Imbalanced Host Response to SARS-CoV-2 Drives Development*  
824 *of COVID-19*. Cell, 2020. **181**(5): p. 1036-1045 e9.
- 825 5. Wang, T., et al., *Single-cell RNA sequencing reveals the sustained immune cell*  
826 *dysfunction in the pathogenesis of sepsis secondary to bacterial pneumonia*.  
827 Genomics, 2021. **113**(3): p. 1219-1233.
- 828 6. Roquilly, A., et al., *Alveolar macrophages are epigenetically altered after*  
829 *inflammation, leading to long-term lung immunoparalysis*. Nat Immunol, 2020. **21**(6):  
830 p. 636-648.
- 831 7. Buehler, P.K., et al., *Bacterial pulmonary superinfections are associated with longer*  
832 *duration of ventilation in critically ill COVID-19 patients*. Cell Rep Med, 2021. **2**(4): p.  
833 100229.
- 834 8. Hou, Y.J., et al., *SARS-CoV-2 D614G variant exhibits efficient replication ex vivo and*  
835 *transmission in vivo*. Science, 2020. **370**(6523): p. 1464-1468.
- 836 9. Luyt, C.E., et al., *Pulmonary infections complicating ARDS*. Intensive Care Med, 2020.  
837 **46**(12): p. 2168-2183.
- 838 10. Dickson, R.P., et al., *Enrichment of the lung microbiome with gut bacteria in sepsis*  
839 *and the acute respiratory distress syndrome*. Nat Microbiol, 2016. **1**(10): p. 16113.
- 840 11. Huffnagle, G.B., R.P. Dickson, and N.W. Lukacs, *The respiratory tract microbiome and*  
841 *lung inflammation: a two-way street*. Mucosal Immunol, 2017. **10**(2): p. 299-306.
- 842 12. Tangye, S.G., U. Palendira, and E.S. Edwards, *Human immunity against EBV-lessons*  
843 *from the clinic*. J Exp Med, 2017. **214**(2): p. 269-283.
- 844 13. Morens, D.M., J.K. Taubenberger, and A.S. Fauci, *Predominant role of bacterial*  
845 *pneumonia as a cause of death in pandemic influenza: implications for pandemic*  
846 *influenza preparedness*. J Infect Dis, 2008. **198**(7): p. 962-70.
- 847 14. Klein, E.Y., et al., *The frequency of influenza and bacterial coinfection: a systematic*  
848 *review and meta-analysis*. Influenza Other Respir Viruses, 2016. **10**(5): p. 394-403.
- 849 15. Liao, M., et al., *Single-cell landscape of bronchoalveolar immune cells in patients with*  
850 *COVID-19*. Nat Med, 2020. **26**(6): p. 842-844.
- 851 16. Wu, M., et al., *Transcriptional and proteomic insights into the host response in fatal*  
852 *COVID-19 cases*. Proc Natl Acad Sci U S A, 2020. **117**(45): p. 28336-28343.
- 853 17. Delorey, T.M., et al., *COVID-19 tissue atlases reveal SARS-CoV-2 pathology and*  
854 *cellular targets*. Nature, 2021. **595**(7865): p. 107-113.
- 855 18. Nie, X., et al., *Multi-organ proteomic landscape of COVID-19 autopsies*. Cell, 2021.  
856 **184**(3): p. 775-791 e14.
- 857 19. Aran, D., Z. Hu, and A.J. Butte, *xCell: digitally portraying the tissue cellular*  
858 *heterogeneity landscape*. Genome Biol, 2017. **18**(1): p. 220.
- 859 20. Ackermann, M., et al., *Pulmonary Vascular Endothelialitis, Thrombosis, and*  
860 *Angiogenesis in Covid-19*. N Engl J Med, 2020. **383**(2): p. 120-128.



- 861 21. Hughes, K.T. and M.B. Beasley, *Pulmonary Manifestations of Acute Lung Injury: More*  
862 *Than Just Diffuse Alveolar Damage*. Arch Pathol Lab Med, 2017. **141**(7): p. 916-922.
- 863 22. Chen, X., et al., *Macrophage polarization and its role in the pathogenesis of acute*  
864 *lung injury/acute respiratory distress syndrome*. Inflamm Res, 2020. **69**(9): p. 883-  
865 895.
- 866 23. Huang, X., et al., *The Role of Macrophages in the Pathogenesis of ALI/ARDS*.  
867 *Mediators Inflamm*, 2018. **2018**: p. 1264913.
- 868 24. Fan, E.K.Y. and J. Fan, *Regulation of alveolar macrophage death in acute lung*  
869 *inflammation*. Respir Res, 2018. **19**(1): p. 50.
- 870 25. Wang, C., et al., *Alveolar macrophage dysfunction and cytokine storm in the*  
871 *pathogenesis of two severe COVID-19 patients*. EBioMedicine, 2020. **57**: p. 102833.
- 872 26. Liu, L., et al., *Anti-spike IgG causes severe acute lung injury by skewing macrophage*  
873 *responses during acute SARS-CoV infection*. JCI Insight, 2019. **4**(4).
- 874 27. Holter, J.C., et al., *Systemic complement activation is associated with respiratory*  
875 *failure in COVID-19 hospitalized patients*. Proc Natl Acad Sci U S A, 2020. **117**(40): p.  
876 25018-25025.
- 877 28. Java, A., et al., *The complement system in COVID-19: friend and foe?* JCI Insight, 2020.  
878 **5**(15).
- 879 29. Perico, L., et al., *Immunity, endothelial injury and complement-induced coagulopathy*  
880 *in COVID-19*. Nat Rev Nephrol, 2021. **17**(1): p. 46-64.
- 881 30. Lu, J.H., et al., *The classical and regulatory functions of C1q in immunity and*  
882 *autoimmunity*. Cell Mol Immunol, 2008. **5**(1): p. 9-21.
- 883 31. Xu, G., et al., *The differential immune responses to COVID-19 in peripheral and lung*  
884 *revealed by single-cell RNA sequencing*. Cell Discov, 2020. **6**: p. 73.
- 885 32. Carvelli, J., et al., *Association of COVID-19 inflammation with activation of the C5a-*  
886 *C5aR1 axis*. Nature, 2020. **588**(7836): p. 146-150.
- 887 33. Li, S., et al., *SARS-CoV-2 triggers inflammatory responses and cell death through*  
888 *caspase-8 activation*. Signal Transduct Target Ther, 2020. **5**(1): p. 235.
- 889 34. Mulay, A., et al., *SARS-CoV-2 infection of primary human lung epithelium for COVID-*  
890 *19 modeling and drug discovery*. Cell Rep, 2021. **35**(5): p. 109055.
- 891 35. Bohlsion, S.S., et al., *Complement, c1q, and c1q-related molecules regulate*  
892 *macrophage polarization*. Front Immunol, 2014. **5**: p. 402.
- 893 36. Son, M., B. Diamond, and F. Santiago-Schwarz, *Fundamental role of C1q in*  
894 *autoimmunity and inflammation*. Immunol Res, 2015. **63**(1-3): p. 101-6.
- 895 37. Thielens, N.M., et al., *C1q: A fresh look upon an old molecule*. Mol Immunol, 2017. **89**:  
896 p. 73-83.
- 897 38. Lebbink, R.J., et al., *Collagens are functional, high affinity ligands for the inhibitory*  
898 *immune receptor LAIR-1*. J Exp Med, 2006. **203**(6): p. 1419-25.
- 899 39. Son, M., et al., *C1q limits dendritic cell differentiation and activation by engaging*  
900 *LAIR-1*. Proc Natl Acad Sci U S A, 2012. **109**(46): p. E3160-7.
- 901 40. Peters, D.M., et al., *TGF-beta directs trafficking of the epithelial sodium channel ENaC*  
902 *which has implications for ion and fluid transport in acute lung injury*. Proc Natl Acad  
903 Sci U S A, 2014. **111**(3): p. E374-83.
- 904 41. Vaz de Paula, C.B., et al., *COVID-19: Immunohistochemical Analysis of TGF-beta*  
905 *Signaling Pathways in Pulmonary Fibrosis*. Int J Mol Sci, 2021. **23**(1).
- 906 42. Files, J.K., et al., *Sustained cellular immune dysregulation in individuals recovering*  
907 *from SARS-CoV-2 infection*. J Clin Invest, 2021. **131**(1).

- 908 43. Jeannet, R., et al., *Severe COVID-19 is associated with deep and sustained*  
909 *multifaceted cellular immunosuppression*. Intensive Care Med, 2020. **46**(9): p. 1769-  
910 1771.
- 911 44. Li, M., et al., *Elevated Exhaustion Levels of NK and CD8(+) T Cells as Indicators for*  
912 *Progression and Prognosis of COVID-19 Disease*. Front Immunol, 2020. **11**: p. 580237.
- 913 45. Bobcakova, A., et al., *Immune Profile in Patients With COVID-19: Lymphocytes*  
914 *Exhaustion Markers in Relationship to Clinical Outcome*. Front Cell Infect Microbiol,  
915 2021. **11**: p. 646688.
- 916 46. Diao, B., et al., *Reduction and Functional Exhaustion of T Cells in Patients With*  
917 *Coronavirus Disease 2019 (COVID-19)*. Front Immunol, 2020. **11**: p. 827.
- 918 47. Filbin, M.R., et al., *Longitudinal proteomic analysis of severe COVID-19 reveals*  
919 *survival-associated signatures, tissue-specific cell death, and cell-cell interactions*. Cell  
920 Rep Med, 2021. **2**(5): p. 100287.
- 921 48. Blackburn, S.D., et al., *Coregulation of CD8+ T cell exhaustion by multiple inhibitory*  
922 *receptors during chronic viral infection*. Nat Immunol, 2009. **10**(1): p. 29-37.
- 923 49. Loibner, M., et al., *Biosafety Requirements for Autopsies of Patients with COVID-19:*  
924 *Example of a BSL-3 Autopsy Facility Designed for Highly Pathogenic Agents*.  
925 Pathobiology, 2021. **88**(1): p. 37-45.
- 926 50. Melms, J.C., et al., *A molecular single-cell lung atlas of lethal COVID-19*. Nature, 2021.  
927 **595**(7865): p. 114-119.
- 928 51. Wauters, E., et al., *Discriminating mild from critical COVID-19 by innate and adaptive*  
929 *immune single-cell profiling of bronchoalveolar lavages*. Cell Res, 2021. **31**(3): p. 272-  
930 290.
- 931 52. Merad, M. and J.C. Martin, *Pathological inflammation in patients with COVID-19: a*  
932 *key role for monocytes and macrophages*. Nat Rev Immunol, 2020. **20**(6): p. 355-362.
- 933 53. McGonagle, D., et al., *The Role of Cytokines including Interleukin-6 in COVID-19*  
934 *induced Pneumonia and Macrophage Activation Syndrome-Like Disease*. Autoimmun  
935 Rev, 2020. **19**(6): p. 102537.
- 936 54. Messner, C.B., et al., *Ultra-High-Throughput Clinical Proteomics Reveals Classifiers of*  
937 *COVID-19 Infection*. Cell Syst, 2020. **11**(1): p. 11-24 e4.
- 938 55. Magro, C., et al., *Complement associated microvascular injury and thrombosis in the*  
939 *pathogenesis of severe COVID-19 infection: A report of five cases*. Transl Res, 2020.  
940 **220**: p. 1-13.
- 941 56. Macor, P., et al., *Multiple-Organ Complement Deposition on Vascular Endothelium in*  
942 *COVID-19 Patients*. Biomedicines, 2021. **9**(8).
- 943 57. Yu, J., et al., *Direct activation of the alternative complement pathway by SARS-CoV-2*  
944 *spike proteins is blocked by factor D inhibition*. Blood, 2020. **136**(18): p. 2080-2089.
- 945 58. Yang, Y.H., et al., *Autoantibodies against human epithelial cells and endothelial cells*  
946 *after severe acute respiratory syndrome (SARS)-associated coronavirus infection*. J  
947 Med Virol, 2005. **77**(1): p. 1-7.
- 948 59. Doran, A.C., A. Yurdagul, Jr., and I. Tabas, *Efferocytosis in health and disease*. Nat Rev  
949 Immunol, 2020. **20**(4): p. 254-267.
- 950 60. Matthay, M.A., et al., *Acute respiratory distress syndrome*. Nat Rev Dis Primers, 2019.  
951 **5**(1): p. 18.
- 952 61. Margaroli, C., et al., *Spatial mapping of SARS-CoV-2 and H1N1 lung injury identifies*  
953 *differential transcriptional signatures*. Cell Rep Med, 2021. **2**(4): p. 100242.
- 954 62. Fernandez, I.E. and O. Eickelberg, *The impact of TGF-beta on lung fibrosis: from*  
955 *targeting to biomarkers*. Proc Am Thorac Soc, 2012. **9**(3): p. 111-6.

- 956 63. Paavola, K.J., et al., *The Fibronectin-ILT3 Interaction Functions as a Stromal*  
957 *Checkpoint that Suppresses Myeloid Cells*. *Cancer Immunol Res*, 2021. **9**(11): p. 1283-  
958 1297.
- 959 64. Tomic, S., et al., *Reduced Expression of Autophagy Markers and Expansion of*  
960 *Myeloid-Derived Suppressor Cells Correlate With Poor T Cell Response in Severe*  
961 *COVID-19 Patients*. *Front Immunol*, 2021. **12**: p. 614599.
- 962 65. Fouet, G., et al., *Molecular Basis of Complement C1q Collagen-Like Region Interaction*  
963 *with the Immunoglobulin-Like Receptor LAIR-1*. *Int J Mol Sci*, 2021. **22**(10).
- 964 66. Hadjadj, J., et al., *Impaired type I interferon activity and inflammatory responses in*  
965 *severe COVID-19 patients*. *Science*, 2020. **369**(6504): p. 718-724.
- 966 67. Cizmecioglu, A., et al., *Apoptosis-induced T-cell lymphopenia is related to COVID-19*  
967 *severity*. *J Med Virol*, 2021. **93**(5): p. 2867-2874.
- 968 68. Feng, Z., et al., *The Novel Severe Acute Respiratory Syndrome Coronavirus 2 (SARS-*  
969 *CoV-2) Directly Decimates Human Spleens and Lymph Nodes*. *medRxiv*, 2020: p.  
970 2020.03.27.20045427.
- 971 69. Sethi, S., et al., *A proposal for standardized grading of chronic changes in native*  
972 *kidney biopsy specimens*. *Kidney Int*, 2017. **91**(4): p. 787-789.
- 973 70. Ishak, K., et al., *Histological grading and staging of chronic hepatitis*. *J Hepatol*, 1995.  
974 **22**(6): p. 696-9.
- 975 71. Gorkiewicz, G., et al., *Species-specific identification of campylobacters by partial 16S*  
976 *rRNA gene sequencing*. *J Clin Microbiol*, 2003. **41**(6): p. 2537-46.
- 977 72. Corman, V.M., et al., *Detection of 2019 novel coronavirus (2019-nCoV) by real-time*  
978 *RT-PCR*. *Euro Surveill*, 2020. **25**(3).
- 979 73. Hadfield, J., et al., *Nextstrain: real-time tracking of pathogen evolution*.  
980 *Bioinformatics*, 2018. **34**(23): p. 4121-4123.
- 981 74. Sagulenko, P., V. Puller, and R.A. Neher, *TreeTime: Maximum-likelihood*  
982 *phylogenetic analysis*. *Virus Evol*, 2018. **4**(1): p. vex042.
- 983 75. Dobin, A., et al., *STAR: ultrafast universal RNA-seq aligner*. *Bioinformatics*, 2013.  
984 **29**(1): p. 15-21.
- 985 76. Langmead, B. and S.L. Salzberg, *Fast gapped-read alignment with Bowtie 2*. *Nat*  
986 *Methods*, 2012. **9**(4): p. 357-9.
- 987 77. Robinson, M.D., D.J. McCarthy, and G.K. Smyth, *edgeR: a Bioconductor package for*  
988 *differential expression analysis of digital gene expression data*. *Bioinformatics*, 2010.  
989 **26**(1): p. 139-40.
- 990 78. Subramanian, A., et al., *Gene set enrichment analysis: a knowledge-based approach*  
991 *for interpreting genome-wide expression profiles*. *Proc Natl Acad Sci U S A*, 2005.  
992 **102**(43): p. 15545-50.
- 993 79. Qi, C., et al., *SCovid: single-cell atlases for exposing molecular characteristics of*  
994 *COVID-19 across 10 human tissues*. *Nucleic Acids Res*, 2022. **50**(D1): p. D867-D874.
- 995 80. Segata, N., et al., *Metagenomic microbial community profiling using unique clade-*  
996 *specific marker genes*. *Nat Methods*, 2012. **9**(8): p. 811-4.
- 997 81. Kostic, A.D., et al., *PathSeq: software to identify or discover microbes by deep*  
998 *sequencing of human tissue*. *Nat Biotechnol*, 2011. **29**(5): p. 393-6.
- 999 82. Bolyen, E., et al., *Reproducible, interactive, scalable and extensible microbiome data*  
1000 *science using QIIME 2*. *Nat Biotechnol*, 2019. **37**(8): p. 852-857.
- 1001 83. Callahan, B.J., et al., *DADA2: High-resolution sample inference from Illumina amplicon*  
1002 *data*. *Nat Methods*, 2016. **13**(7): p. 581-3.

1003 84. Segata, N., et al., *Metagenomic biomarker discovery and explanation*. *Genome Biol*,  
 1004 2011. **12**(6): p. R60.  
 1005

1006

1007 **Supplemental Figures**

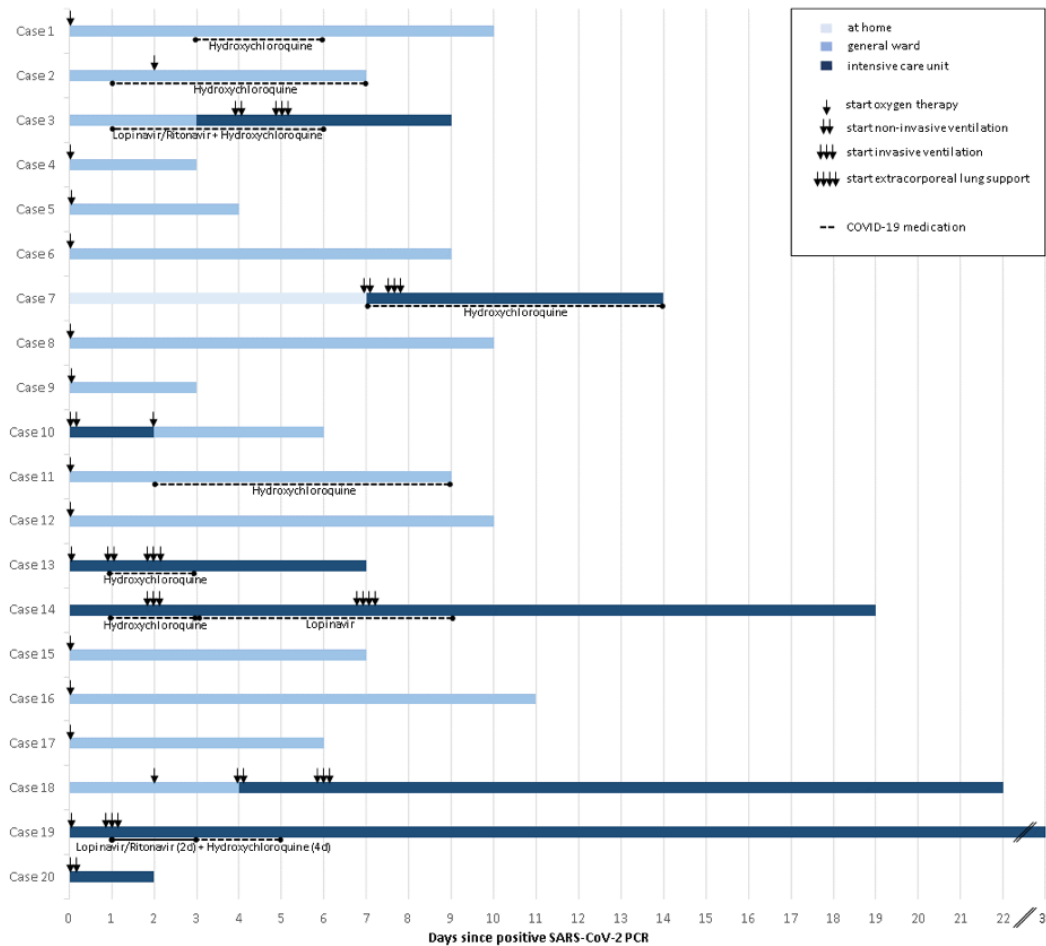

1008

1009 **Figure S1. Clinical courses of covid-19 cases.** X-axis specifies interval from SARS-CoV-2 positive  
 1010 PCR. Treatment in the general ward and/or intensive care unit is shown. Start of ventilation  
 1011 therapies is indicated by arrows. Covid-19 specific therapies are indicated.  
 1012

1013

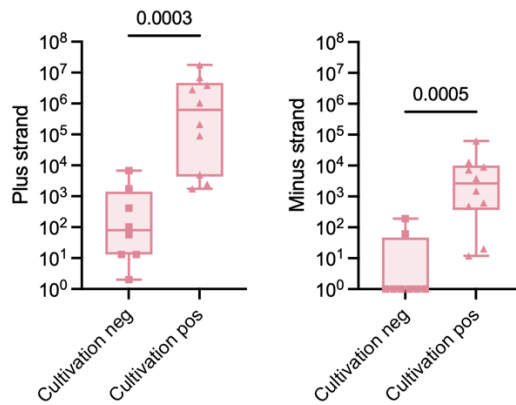

1014  
1015  
1016  
1017  
1018  
1019  
1020

**Figure S2.** Relation of SARS-CoV-2 cultivability and transcript levels determined by RNAseq (Mann-Whitney test).

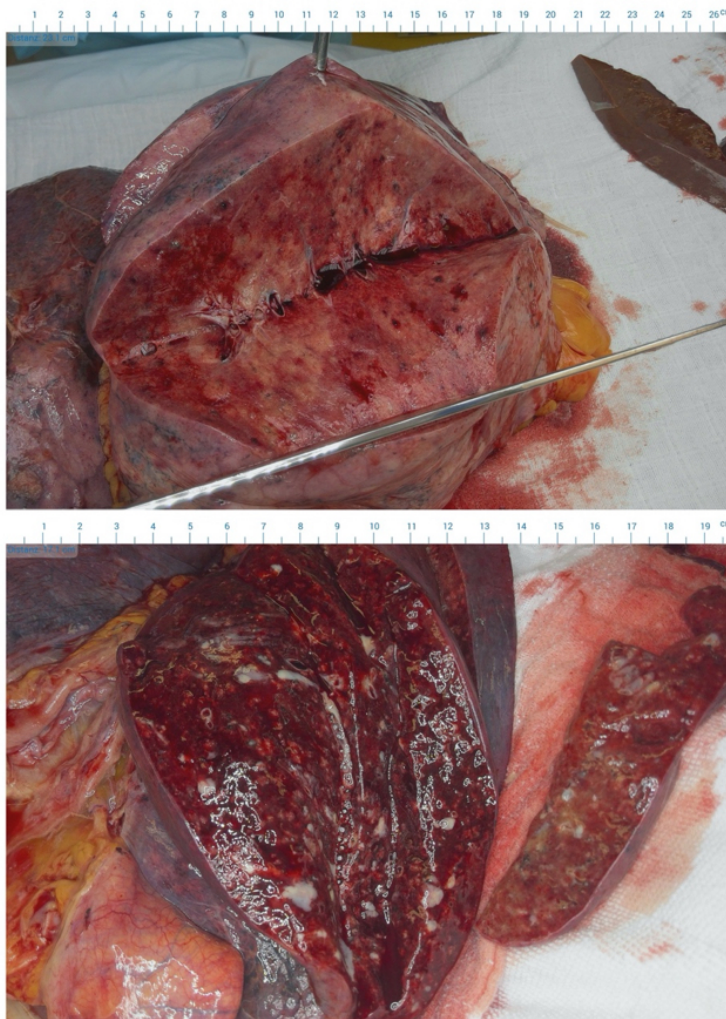

1021  
1022  
1023  
1024  
1025  
1026

**Figure S3. Gross pathology representation of lung. (Top)** Section through a lobe with DAD. The lung parenchyma is inhomogeneously colored and consolidated. **(Bottom)** A case with bacterial superinfection shows pus in bronchial lumina and on the cut surface of the lung.

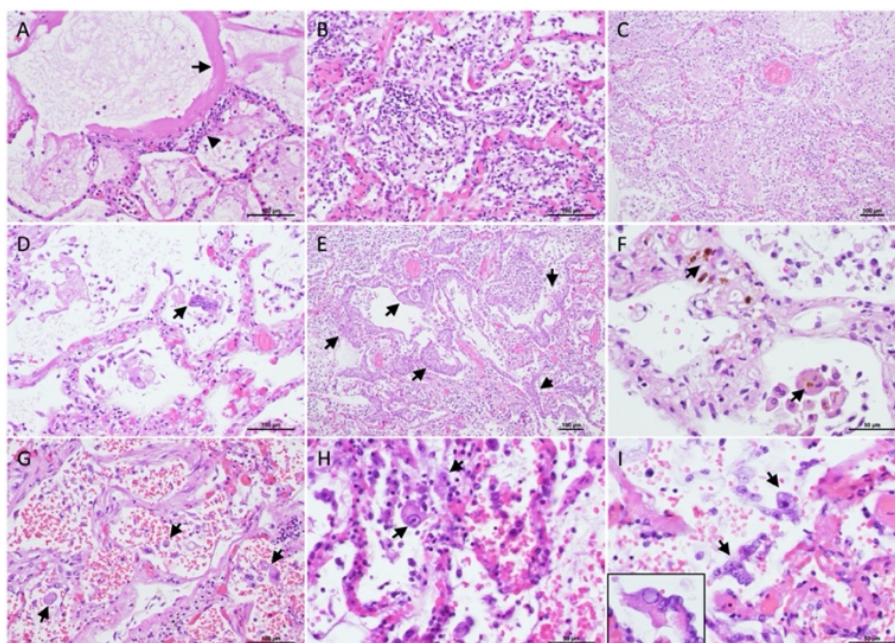

1027  
1028  
1029  
1030  
1031  
1032  
1033  
1034  
1035  
1036  
1037

**Figure S4. Histological representation of DAD in covid-19.** (A) Exudative DAD with hyaline membranes (arrows) and lymphocytic interstitial infiltrates in alveolar septa (arrowhead). (B, C) Organizing DAD with intra-alveolar fibro-cellular infiltrates. (D) Multinucleated syncytial pneumocytes in organizing DAD (arrow). (E) Squamous metaplasia in organizing DAD (arrows). (F) Hemosiderin in alveolar septa and alveolar macrophages (arrows). (G-I) Pneumocyte nuclear atypia with macro-nucleoli (arrows; "owl-eye" in H). Atypical pneumocytes are often scaled off the alveolar membrane. In G also alveolar hemorrhage is evident. Inset in I shows ground-glass nuclear changes in atypical pneumocytes.

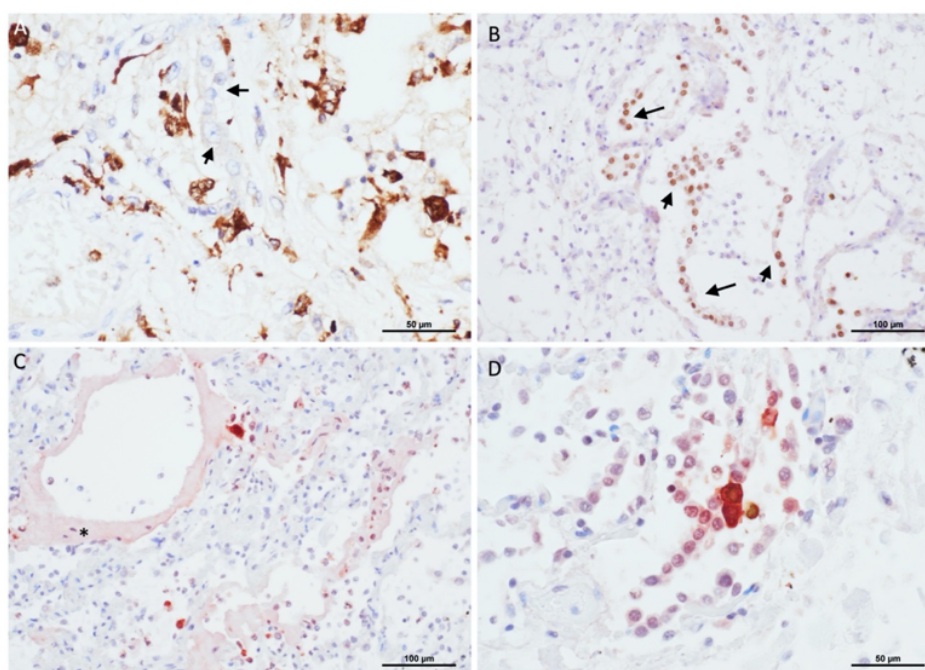

1038  
1039  
1040  
1041  
1042  
1043

**Figure S5. Immunohistochemical analyses of DAD.** (A) Macrophage specific CD68 staining. Note the non-stained atypical pneumocytes (arrows). (B) Pneumocytes are scaled-off from the alveolar membrane (pneumocyte specific nuclear TTF-1 staining, arrows). (C, D) SARS-CoV-2 nucleoprotein staining of infected pneumocytes; asterisk (\*) marks a hyaline membrane.

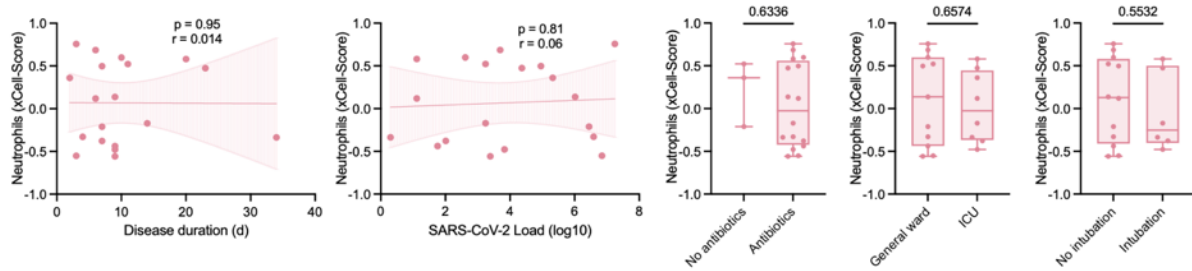

1044  
1045  
1046  
1047  
1048

**Figure S6. Neutrophils and clinical parameters.** Correlation analyses of neutrophil abundance (determined by deconvolution of RNAseq data with xCell) and clinical parameters (Spearman correlation, Mann-Whitney test).

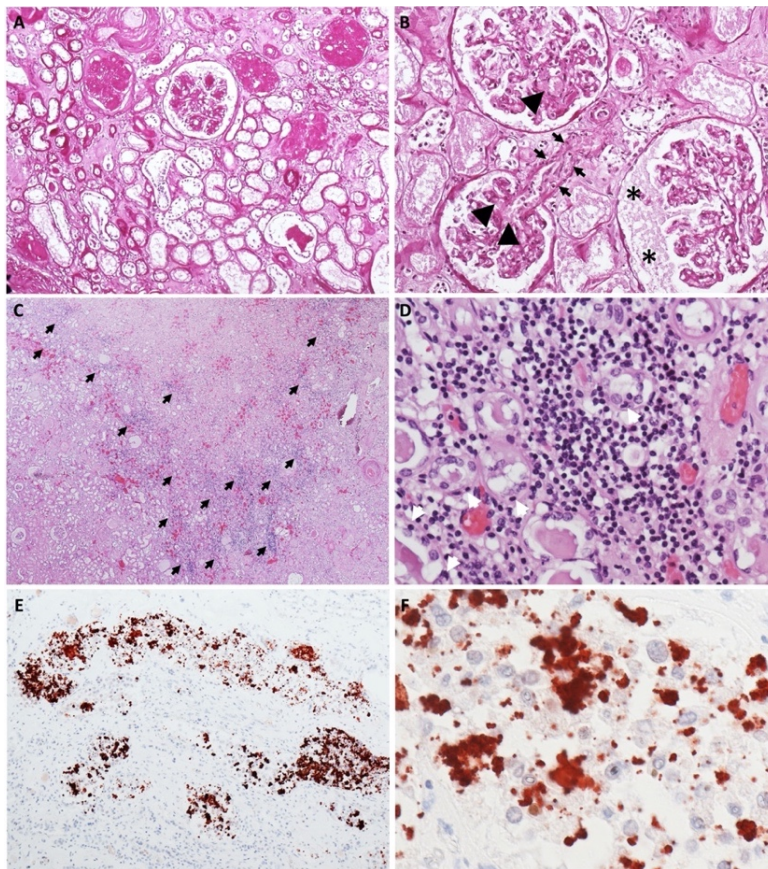

1049  
1050  
1051  
1052  
1053  
1054  
1055  
1056  
1057  
1058  
1059  
1060  
1061  
1062  
1063  
1064

**Figure S7 Kidney histopathology.** (A) PAS-stained kidney specimen with advanced diffuse and nodular diabetic glomerulosclerosis, advanced parenchymal atrophy and severe arteriolohyalinosis (100-fold). (B) PAS-stained kidney specimen showing segmental obliteration of glomerular capillary loops by fibrin thrombi (arrowheads), endothelitis of a glomerular arteriole (arrows) and accumulation of plasma in Bowman's space (asterisks; 200-fold). (C) Overview of an H&E-stained kidney specimen with diffuse lymphocytic tubulointerstitial nephritis (arrows; 20-fold). (D) H&E-stained kidney specimen showing severe tubular epithelial changes: loss of brush border, nuclear swelling and cytoplasmic vacuolisation. Note the tubulointerstitial inflammatory cell infiltrate, mainly consisting of lymphocytes with foci of tubulitis, as characterized by the presence of mononuclear cells on the basolateral aspect of the tubular epithelial cells (400-fold). (E, F) Immunohistochemical detection of SARS-CoV-2 nucleoprotein showing granular staining predominantly in the cytoplasm and occasionally in the nuclei of tubular epithelial cells of large distal tubules (100-fold & 600-fold, respectively).

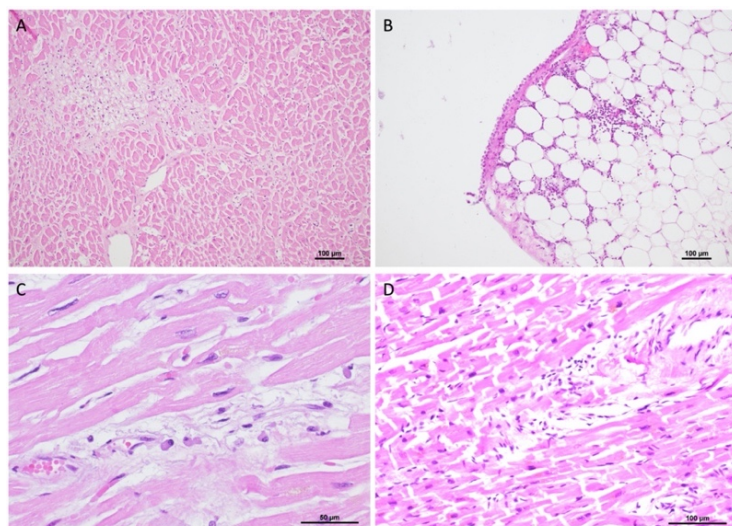

1065  
1066  
1067  
1068  
1069  
1070

**Figure S8. Heart histopathology.** (A) Fresh small scar in the myocardium. (B) Sparse subepicardial lymphocytic infiltrate. (C, D) Single plasma cells and lymphocytes in the endomysium around vessels.

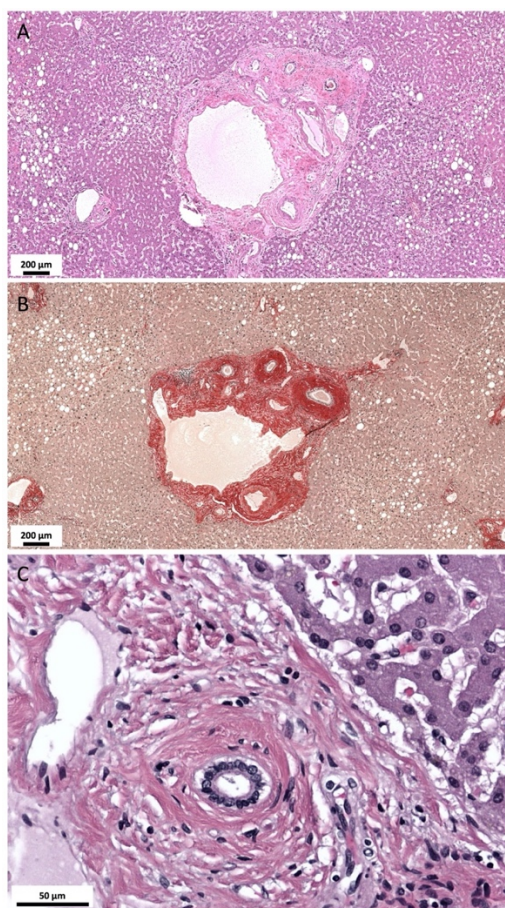

1071  
1072  
1073  
1074  
1075  
1076  
1077  
1078

**Figure S9. Liver Histopathology.** Morphological changes resembling sclerosing cholangitis COVID 19. (A) Preserved lobular architecture. Mild macrovesicular steatosis of the lobular parenchyma. Liver septum with mild lymphocytic infiltrates and septal bile duct adjacent to the A. hepatica branch surrounded by thick layer of condensed collagen fibers (50-fold; hematoxylin & eosin). (B) Sclerosis is highlighted by the sirius red connective tissue stain (50-fold; sirius red). (C) Portal tract with interlobular bile duct and periductal sclerosis.



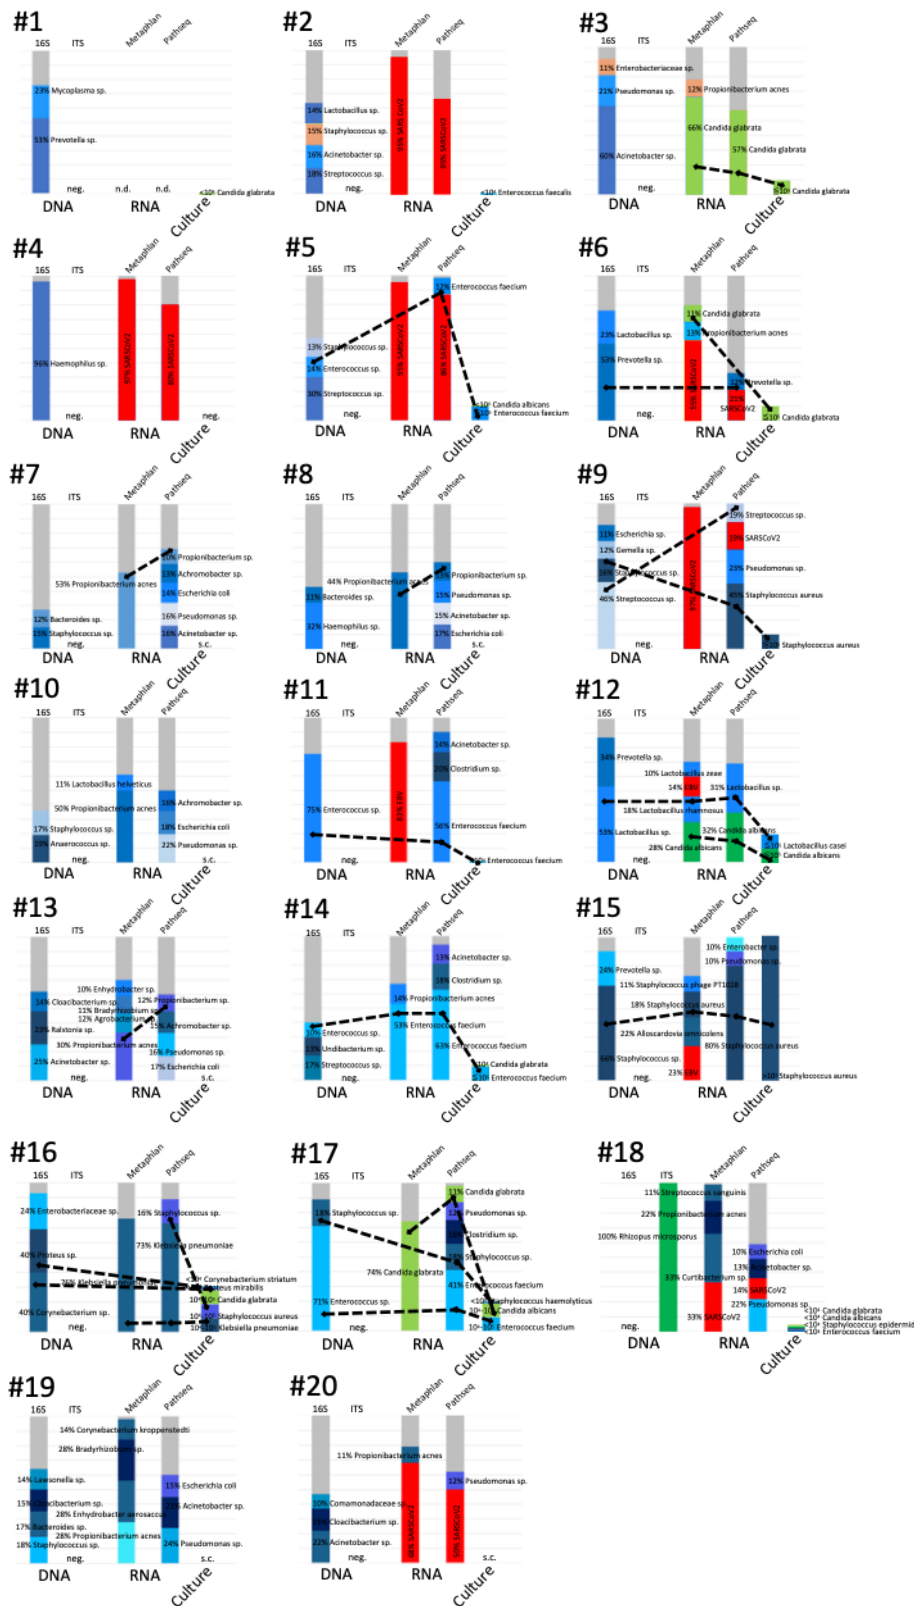

1079

1080

1081

1082

1083

1084

1085

**Figure S10. Dominant taxa identified by molecular methods and cultivation in covid-19 lungs.** Shown is the relative abundance of 16S rRNA gene and ITS sequencing and microbial RNAseq data annotated with Metaphlan or Pathseq pipelines.

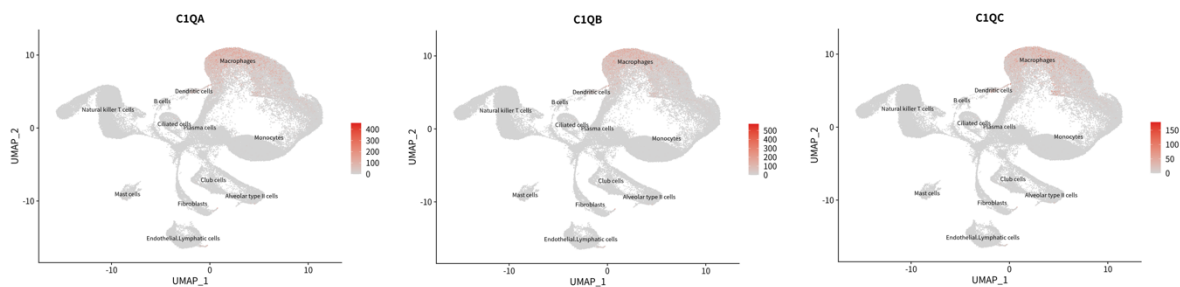

1086  
1087 **Figure S11. Single cell transcriptomic analysis.** *C1q A, B* and *C* chains are mainly expressed  
1088 by macrophages. Data derived from Xu et al [31] and analyzed with SCovid single-cell atlas  
1089 database [79].  
1090  
1091

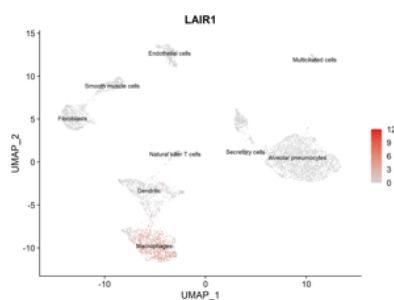

1092  
1093  
1094 **Figure S12. Single cell transcriptomic analysis.** *LAIR-1* is mainly expressed by macrophages.  
1095 Data derived from Delorey et al [17] and analyzed with SCovid single-cell atlas database [79].  
1096  
1097

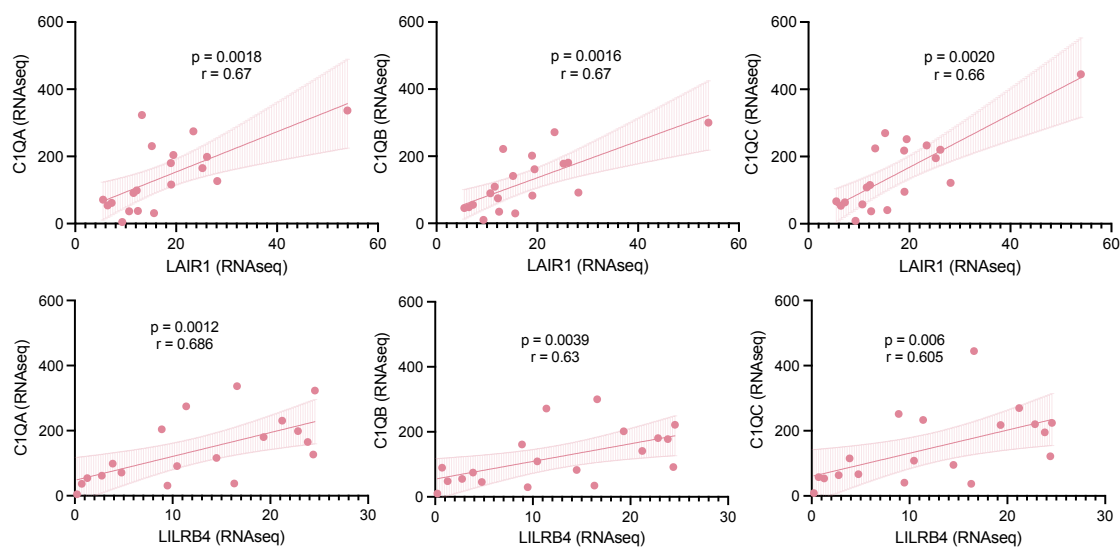

1098  
1099  
1100 **Figure S13. Transcriptomic correlation of *C1q*, *LAIR-1* and *LILRB4* from RNAseq.** Correlation  
1101 of *C1q* chains with *LAIR-1* (top) and *LILRB4* (bottom; Spearman correlation).  
1102

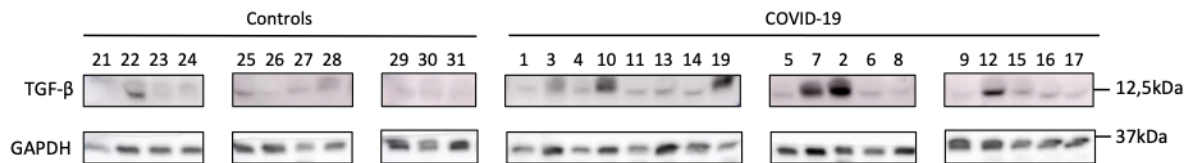

1103  
1104  
1105  
1106  
1107  
1108

**Figure S14.** TGF beta 1 (12.5 kDa) western blots in covid-19 lung tissues and controls (reference human GAPDH).

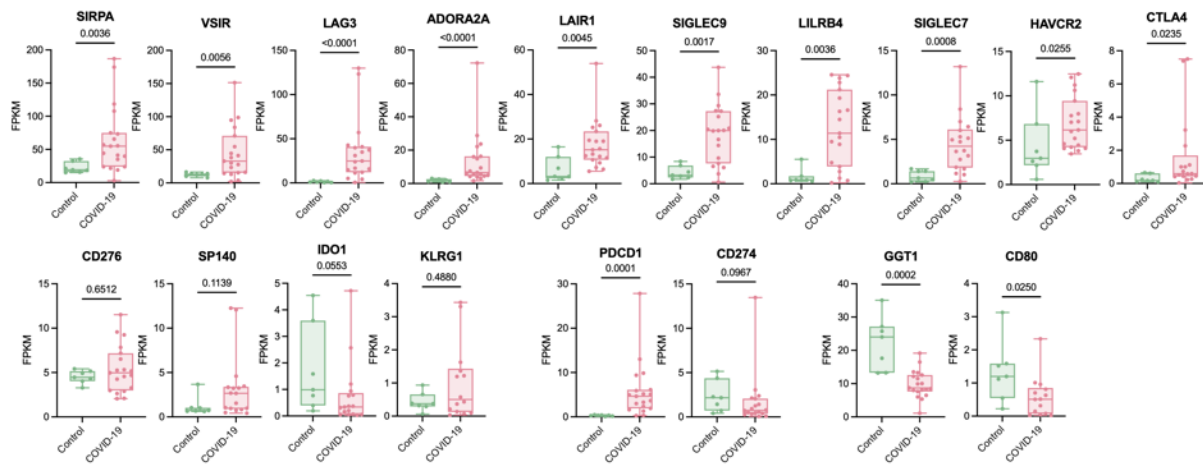

1109  
1110  
1111  
1112  
1113

**Figure S15.** Inhibitory immune checkpoints in covid-19 and controls from RNAseq. Immune checkpoint inhibitor expression in covid-19 compared to controls (Mann-Whitney test).

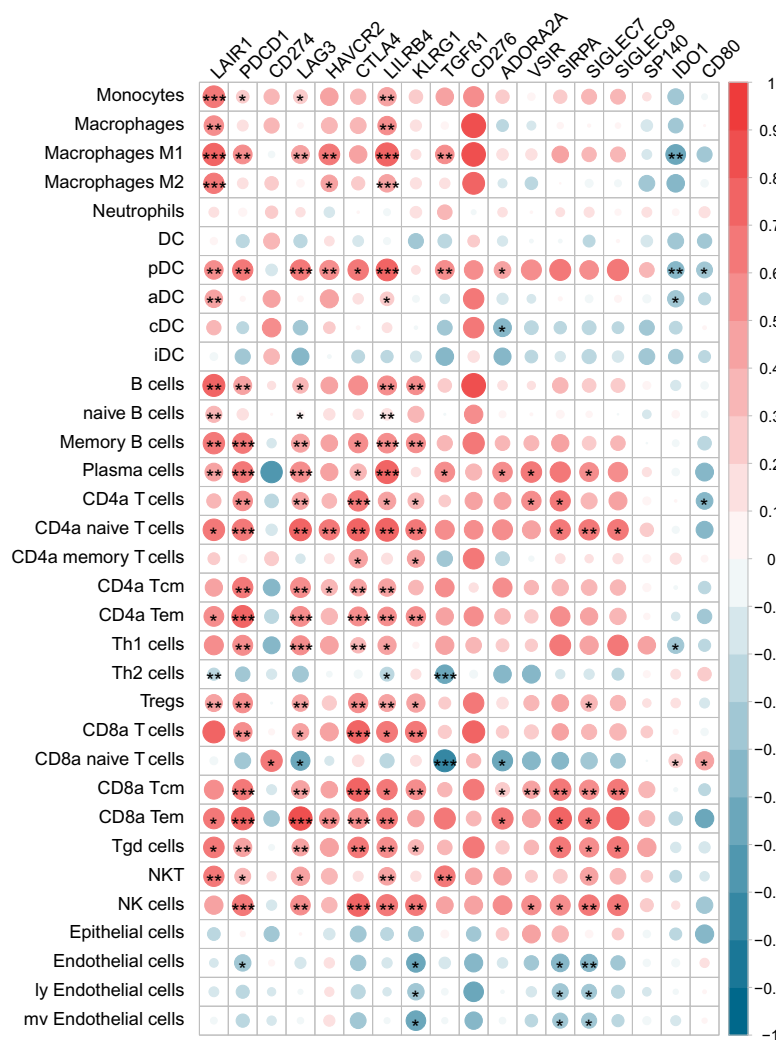

1114  
 1115 **Figure S16. Inhibitory immune checkpoints and cell types from RNAseq data.** Correlation  
 1116 analysis of immune-checkpoints and cell types derived from xCell analysis (Spearman  
 1117 correlation; p\* < 0.05, p\*\*\* < 0.001).
